# Supplementary material for: Characterization of chromatin accessibility with a transposome hypersensitive sites sequencing (THS-seq) assay
Source: PubMed Central journal article supplement (PMC4743176; doi:10.1186/s13059-016-0882-7), 2016-02-04
Supplement: 13059_2016_882_MOESM1_ESM.pdf [file 13059_2016_882_MOESM1_ESM.pdf]

| Supplementary File      | Title                                                                                                                                            |
|-------------------------|--------------------------------------------------------------------------------------------------------------------------------------------------|
| Supplementary Figure 1  | Schematic of transposon design and transposome complex generation                                                                                |
| Supplementary Figure 2  | Validation of successful transposon insertion and DNA fragmentation                                                                              |
| Supplementary Figure 3  | Validation of T7 <i>in vitro</i> transcription                                                                                                   |
| Supplementary Figure 4  | Validation of PCR amplification for barcode addition                                                                                             |
| Supplementary Figure 5  | Tn5059 concentration titrations and titration of dimethylformamide concentrations for optimal <i>in vitro</i> transcription amplification yields |
| Supplementary Figure 6  | Comparison of peak region distances to transcription start starts.                                                                               |
| Supplementary Figure 7  | Significant gene ontology biological processes categories for each peaks dataset                                                                 |
| Supplementary Figure 8  | Quantitation of mitochondrial reads in all datasets                                                                                              |
| Supplementary Figure 9  | 100-cell THS-seq/Tn5059 read statistics analysis to determine minimal number of raw reads for quality data                                       |
| Supplementary Figure 10 | Peak overlap comparisons in all datasets                                                                                                         |
| Supplementary Figure 11 | Base pair overlap comparisons in all datasets                                                                                                    |
| Supplementary Figure 12 | Examination of peak overlap in a pairwise comparison of all experimental datasets                                                                |
| Supplementary Figure 13 | Examination of base pair overlap in a pairwise comparison of all experimental datasets                                                           |
| Supplementary Figure 14 | 200 kb view of accessible chromatin marks in 500 cell datasets                                                                                   |

|                         |                                                                                                                                                          |
|-------------------------|----------------------------------------------------------------------------------------------------------------------------------------------------------|
| Supplementary Figure 15 | Overview of chromatin accessibility at gene loci enriched in 100- and 500-cell THS-seq data with Tn5059 and not enriched in 500-cell ATAC-seq/EzTn5 data |
| Supplementary Figure 16 | Overview of chromatin accessibility at major genes implicated in cancer and in immune system function                                                    |
| Supplementary Figure 17 | Peak size distribution comparisons between THS-seq, ATAC-seq and ENCODE data                                                                             |
| Supplementary Figure 18 | Validation of peaks based on peak length                                                                                                                 |
| Supplementary Figure 19 | THS-seq and ATAC-seq peak capture preferences                                                                                                            |
| Supplementary Figure 20 | Comparison of 500-cell ATAC-seq/EzTn5 data to published ATAC-seq data                                                                                    |
| Supplementary Figure 21 | 200 kb view of accessible chromatin in ATAC-seq/EzTn5 data versus published ATAC-seq data                                                                |
| Supplementary Table 1   | 100-cell THS-seq/Tn5059 data and controls with read statistics and data analysis                                                                         |
| Supplementary Table 2   | Peak size counts versus lengths of Dfilter called peaks for each sample                                                                                  |
| Supplementary Table 3   | Analysis of datasets down sampled to 8,351,125 unique reads and analysis of published ATAC-seq datasets                                                  |
| Supplementary Table 4   | Original datasets analysis results                                                                                                                       |
| Supplementary Table 5   | THS-seq oligo sequences                                                                                                                                  |

**Supplementary Figure 1 description:**

Schematic of transposon design and transposome complex generation. Transposon consists of the T7 promoter, Read primer sequence, and the mosaic end sequence for Tn5 binding that is contained within the read sequence.

**Supplementary Figure 2 description:**

Validation of successful transposon insertion and DNA fragmentation. The first two lanes are reactions using 0.7  $\mu\text{M}$  Tn5059, the third and fourth lanes are reactions containing 0.5  $\mu\text{M}$  EzTn5, the fifth and sixth lanes have Tn5 replaced with nuclease free water, the seventh lane is a reaction with 0.7  $\mu\text{M}$  Tn5059 and with water substituted for DNA in the reaction, and the eighth lane is a reaction with 0.5  $\mu\text{M}$  EzTn5 with water substituted for DNA in the reaction. The customized EzTn5 and Tn5059 transposomes are designed to fragment DNA upon transposon incorporation. By fragmenting DNA, this implies the mosaic end DNA oligo and transposon oligo anneal correctly, the transposome complex is forming correctly, the transposome complex is active, and the transposome complex can successfully fragment DNA and insert the transposon. Successful attachment of the transposon is indicated by generation of *in vitro* transcribed RNA, which is shown in Supplementary Figure 3. It is not expected to have dark smears for fragmented DNA, since 6 nanograms of DNA were used as input and no PCR was done after fragmentation. Experimentally a transposition reaction was performed on samples, cleaned with zymo DNA clean and concentrator, and then run on a 6% Tris-borate-EDTA (TBE) gel.

**Supplementary Figure 3 description:**

Validation of T7 *in vitro* transcription. 6% Tris-Borate-Urea (TBU) gels assaying for single stranded nucleic acids, in this case RNA, are used for validation of RNA amplification from *in vitro* transcription. Generally smears are seen from ~150 base pairs to >2000 base pairs. (a) RNA smears from THS-seq/Tn5059 using 100 cells, 1000 cells and 6 nanograms of pure DNA. No RNA smear is generated for the NTC control. (b) Quantitation of the *in vitro* transcribed RNA smears present in (a). (c) RNA smears are also present for assaying with both 500-cell THS-seq/Tn5059 and 500-cell THS-seq with Ez-Tn5 and 6 nanograms of pure DNA with each respective enzyme. No RNA smears are generated for the NTC controls for each respective enzyme. (d) Quantitation of the *in vitro* transcribed RNA smears present in (c).

**Supplementary Figure 4 description:**

Validation of PCR amplification for barcode addition. 6% TBE gels for assaying double stranded DNA are used here for confirming generation of barcoded libraries. (a) Libraries have been successfully generated for THS-seq/Tn5059 using 100 cells, 1000 cells and with 6 nanograms of pure DNA. No DNA smears are generated for the NTC control. (b) Quantitation of size selected library smears present in (a). (c) DNA smears are also present for assaying with both 500-cell THS-seq/Tn5059 and 500-cell THS-seq with Ez-Tn5 and 6 nanograms of pure DNA with each respective enzyme. No DNA smears are generated for the NTC controls for each respective enzyme. (d) Quantitation of size selected library smears present in (c). Subsequently libraries are pooled, and gel size selected between ~220-250 to ~1000 base pairs to remove primers and primer dimers below the 220-250 base pair range.

### **Supplementary Figure 5 description:**

Tn5059 concentration titrations and titration of dimethylformamide concentrations for optimal *in vitro* transcription amplification yields. (a-d) Concentration titrations were performed to determine the optimal concentration of Tn5059 for assaying accessible chromatin on 1000 GM12878 lymphoblastoid cells that gives the most *in vitro* transcription amplification product. 6% TBE gels were used for visualization. (a,b) Concentration titration of Tn5059 was performed at a range of 3.5  $\mu\text{M}$  to 0.2  $\mu\text{M}$  Tn5059 final concentration in reaction. Here 0.9  $\mu\text{M}$  Tn5059 gave the best amplification and the reaction with 3.5  $\mu\text{M}$  Tn5059 was similar, however the smear looks washed out and not how IVT smears usually appear, also with 0.9  $\mu\text{M}$  Tn5059 reagents are saved. The 1.8  $\mu\text{M}$  Tn5059 reaction possibly had pipetting errors. (c,d) The concentration titration of Tn5059 was performed with 0.7  $\mu\text{M}$  to 0.1  $\mu\text{M}$  Tn5059 final in reaction, and here 0.7  $\mu\text{M}$  gave the strongest amplification. The quantitation of IVT RNA differs greatly between the gels since differences in how the ladders ran affected quantitation, however the trends are similar. We also performed a titration on DMF to determine the optimal concentration for tagmentation that gives the most *in vitro* transcription amplification product. Reactions used 1000 GM12878 lymphoblastoid cells. Titration was performed on a transposon that was 17 base pairs longer than the one used in the study, T7tspn-top2, however the result of this titration should be applicable to any transposon that is being used to assay accessible chromatin. The concentration of other tagmentation reaction buffer components that was kept consistent while DMF concentrations were varied was, 165 mM Tris-OAc, pH 7.8, 330 mM K-OAc, 50 mM Mg-OAc. All reactions were carried out in 5  $\mu\text{L}$  solutions. (e) First a wider range of DMF concentrations were titrated, and once an optimal concentration was determined, (f) a narrower range was titrated to confirm the results.

**Supplementary Figure 6 description:**

Comparison of peak region distances to transcription start sites. For peak calling all samples were down sampled to 8,351,125 unique reads. Peak files generated by Dfilter were inputted into GREAT for analysis. Peak regions that caused database errors were removed, which was usually one to ten peaks per file, and thus should not impact the analysis. The replicate represented in each analysis was chosen based on if they had more base pairs called significant, and more base pair overlap with ENCODE data. Datasets represented are: (a) 100-cell THS-seq/Tn5059 Rep2, (b) 500-cell THS-seq/Tn5059 Rep1, (c) 500-cell THS-seq/EzTn5 Rep1, (d) 500-cell ATAC-seq/Tn5059 Rep2, (e) 500-cell ATAC-seq/EzTn5 Rep2.

**Supplementary Figure 7 description:**

Significant gene ontology biological processes categories for each peaks dataset. This is part of the same analysis performed by GREAT that was used in Supplementary Figure 6, and thus the same peaks files are used as input. The replicate represented was chosen based on if they had more base pairs called significant, and more base pair overlap with ENCODE data. Datasets represented are: (a) 100-cell THS-seq/Tn5059 Rep2, (b) 500-cell THS-seq/Tn5059 Rep1, (c) 500-cell THS-seq/EzTn5 Rep1, (d) 500-cell ATAC-seq/Tn5059 Rep2, (e) 500-cell ATAC-seq/EzTn5 Rep2.

**Supplementary Figure 8 description:**

Quantitation of mitochondrial reads in all datasets. The number of mitochondrial reads (chrM) were counted and represented as a percentage of (a) the total number of clonal reads, and (b) the total number of mapped reads in each dataset. (c) In 100-cell THS-seq/Tn5059, the proportion of clonal reads from each chromosome was calculated as a percentage of the total clonal reads for each sample.

**Supplementary Figure 9 description:**

100-cell THS-seq/Tn5059 read statistics analysis to determine minimal number of raw reads for quality data. Raw reads were down sampled in increments of 10 million reads with in house scripts, run through BWA with default parameters, and then were run through Dfilter to (a) call peaks, (b) determine total number of base pairs called significant, (c) calculate ENCODE data overlap, and (d) determine the total number of unique and clonal reads. The mean and standard deviation between the two 100-cell THS-seq/Tn5059 replicates was calculated and displayed.

**Supplementary Figure 10 description:**

Peak overlap comparisons in all datasets. Peaks were counted as overlapped if at least one base pair is overlapped in two significant peaks that are overlapped against each other in the datasets being compared. All samples except ENCODE Duke and UW samples were down sampled to the same number of unique reads, 8,351,125, before peak calling. (a) Peak overlap for all experimental replicates when overlapped against each other. (b) Peak overlap for the experimental replicate with the most base pairs called significant against ENCODE Duke data. (c) Peak overlap for the experimental replicate with the most base pairs called significant against ENCODE UW data. (d) Peak overlap for the experimental replicate with the most base pairs called significant against published 50,000-cell ATAC-seq replicate 4 data. (e) Peak overlap of ENCODE UW and Duke data against themselves, and ENCODE UW and Duke data against published 50,000-cell ATAC-seq replicate 4 data.

**Supplementary Figure 11 description:**

Base pair overlap comparisons in all datasets. If a base pair that is within a significant peak is overlapped with the same base pair in a significant peak in the dataset being compared to, then it is called significant and counted. All samples except ENCODE Duke samples were down sampled to the same number of unique reads, 8,351,125, before peak calling. (a) Base pair overlap for all experimental replicates when overlapped against each other. (b) Base pair overlap for the experimental replicate with the most base pairs called significant against ENCODE Duke data. (c) Base pair overlap for the experimental replicate with the most base pairs called significant against published 50,000-cell ATAC-seq replicate 4 data. (d) Base pair overlap of the two most comprehensive published 50,000-cell ATAC-seq datasets, replicate 3 and replicate 4.

**Supplementary Figure 12 description:**

Examination of peak overlap in a pairwise comparison of all experimental datasets. Peaks were counted as overlapped if at least one base pair is overlapped in two significant peaks that are overlapped against each other, in the datasets being compared. All samples were down sampled to the same number of unique reads, 8,351,125, before peak calling.

**Supplementary Figure 13 description:**

Examination of base pair overlap in a pairwise comparison of all experimental datasets. If a base pair that is within a significant peak is overlapped with the same base pair in a significant peak in the dataset being compared to, then it is called significant and counted. All samples were down sampled to the same number of unique reads, 8,351,125, before peak calling.

**Supplementary Figure 14 description:**

200 kb view of accessible chromatin marks in 500 cell datasets. Comparison between THS-seq/Tn5059, THS-seq/EzTn5, ATAC-seq/Tn5059, and ATAC-seq/EzTn5 against ENCODE GM12878 lymphoblastoid cell chromatin accessibility data from Duke and UW, and against histone modifications which are often found near regulatory elements and promoters. All samples were down sampled to the same number of unique reads, 8,351,125, before viewing tracts.

**Supplementary Figure 15 description:**

Overview of chromatin accessibility at gene loci enriched in 100- and 500-cell THS-seq/Tn5059 data and not enriched in 500-cell ATAC-seq/EzTn5 data. Enriched genes from GREAT were used to determine which genes were enriched in THS-seq and not ATAC-seq. 100- and 500-cell THS-seq/Tn5059 and 500-cell ATAC-seq/EzTn5 were down sampled to the same number of unique reads, 8,351,125, before analysis. UW DNase chromatin accessibility data was used for comparison since it was the most comprehensive of the GM12878 ENCODE datasets. ENCODE histone modifications which are often found near regulatory elements and promoters are also depicted. The replicate with the highest number of base pairs called significant was used in the read density data tract for each sample and for analysis. Also under each tract, the regions called significant by Dfilter are represented by bars. The gene loci for (a) ABCA12, (b) FRCL4, (c) IFI44, (d) PDGFD, and (e) PHLDB2 are represented.

**Supplementary Figure 16 description:**

Overview of chromatin accessibility at major genes implicated in cancer and in immune system function. 100- and 500-cell THS-seq/Tn5059 data and 500-cell ATAC-seq/EzTn5 data were down sampled to the same number of unique reads, 8,351,125, before analysis. UW DNase chromatin accessibility data was used for comparison since it was the most comprehensive of the GM12878 ENCODE datasets. ENCODE histone modifications which are often found near regulatory elements and promoters are also depicted. The replicate with the highest number of base pairs called significant was used in the read density data tract for each sample and for

analysis. Also under each tract, the regions called significant by Dfilter are represented by bars. The gene loci for (a) BCL2, (b) CASP3, (c) CD38, (d) the interferon gene cluster and specifically IFNA2, and (e) MAPK1 are represented. Enrichments performed by GREAT reported BCL2, CD38 and MAPK1 in the B cell receptor signaling pathway gene ontology biological process category. BCL2, CD38 and MAPK1 were reported for the B cell homeostasis gene ontology biological process category. IFNA2, IFNA1, IFNA5, IFNA6 and IFNA8 were reported for the response to type I interferon gene ontology biological process category.

#### **Supplementary Figure 17 description:**

Peak size distribution comparisons between THS-seq, ATAC-seq and ENCODE data. ENCODE data from Duke and UW for chromatin accessibility on GM12878 lymphoblastoid cells was processed as described in methods. All THS-seq and ATAC-seq datasets were down sampled to the same number of unique reads, 8,351,125, before analysis, except for 100-cell THS-seq/Tn5059 datasets, and the published 500-cell ATAC-seq replicate two dataset, which had less than 8,351,125 unique reads. For all datasets, counts of the number of peaks for each peak size were performed in 100 base pair increments, using the peaks file generated by Dfilter. Some data points were excluded from the graphs because values were beyond the axis, and the number of data points excluded for each graph is: (a) 14, (b) 8, (c) 8, (d) 8, (e) 8, (f) none, (g) 8, (h) 11. Samples compared to ENCODE data include: (a) 100-cell THS-seq/Tn5059, (b) 500-cell THS-seq/Tn5059, (c) 500-cell THS-seq/EzTn5, (d) 500-cell ATAC-seq/Tn5059, (e) 500-cell ATAC-seq/EzTn5, (g) Published 50,000-cell ATAC-seq data, and (h) published 500-cell ATAC-seq data. (f) A peaks distribution comparison of 500-cell THS-seq/Tn5059 was also done against published 50,000-cell ATAC-seq data.

#### **Supplementary Figure 18 description:**

Validation of peaks based on peak length. (a) The percentage more peaks found in 100-cell and 500-cell THS-seq/Tn5059 data then in 500-cell ATAC-seq/EzTn5 data, and the percentage more 100-cell and 500-cell THS-seq/Tn5059 and UW base pair overlap then in 500-cell ATAC-seq/EzTn5. (b) Zoom in on graph (a) showing the peak lengths between 100-1200 base pairs. (c) The percentage more peaks found in 100-cell and 500-cell THS-seq/Tn5059 data then in 500-cell ATAC-seq/EzTn5 data, and the percentage more 100-cell and 500-cell THS-seq/Tn5059 and Duke base pair overlap then in 500-cell ATAC-seq/EzTn5. (d) Zoom in on graph (c) showing the peak lengths between 100-1200 base pairs. (e) The percentage more peaks found in 100-cell and 500-cell THS-seq/Tn5059 data then in 500-cell ATAC-seq/EzTn5



data, and the percentage more normalized 100-cell and 500-cell THS-seq/Tn5059 and Duke base pair overlap than in 500-cell ATAC-seq/EzTn5. Normalizing was performed using the global base pair overlap values for the ENCODE Duke dataset. (f) Zoom in on graph (e) showing the peak lengths between 100-1200 base pairs.

**Supplementary Figure 19 description:**

THS-seq and ATAC-seq peak capture preferences. All datasets were down sampled to 8,351,125 unique reads before analysis. Normalization was performed by calculating the number of reads per 100 base pairs in each peak, and any peaks with zero alignments were removed before analysis. (a-c) For all peaks in each individual dataset, the normalized number of alignments in each peak represented by mean  $\pm$  SEM in (a) 500-cell THS-seq/Tn5059 and 500-cell ATAC-seq/EzTn5 (b) 100-cell and 500-cell THS-seq/Tn5059 (c) 100-cell THS-seq/Tn5059 and published 500-cell ATAC-seq data. Some data points were excluded from the graphs because values were beyond the axis, and the number of data points excluded for each graph is: (a) 13, (b) 4, and (c) 15. (d-h) For all peaks in each individual dataset, the normalized number of unique alignments in each peak, visualized from highest peak length to lowest, and with the most to the least number of normalized unique alignments for each peak length from left to right. Datasets represented had the most base pairs called significant by Dfilter of the two replicates for each condition. Datasets include (d) 100-cell THS-seq/Tn5059 Rep2, (e) 500-cell THS-seq/Tn5059 Rep1, (f) 500-cell THS-seq/EzTn5 Rep1, (g) 500-cell ATAC-seq/Tn5059 Rep2, and (h) 500-cell ATAC-seq/EzTn5 Rep2.

**Supplementary Figure 20 description:**

Comparison of 500-cell ATAC-seq/EzTn5 data to published ATAC-seq data. A modified protocol that included an optimized tagmentation buffer and protease digestion of proteins and transposase were used for generating 500-cell ATAC-seq/EzTn5 data, which was then compared to published 50,000-cell ATAC-seq data, and published 500-cell ATAC-seq data. All samples were down sampled to the same number of unique reads, 8,351,125, before analysis. The replicate with the highest number of base pairs called significant was used in the venn diagram representations for each sample and in analysis. Comparisons were made examining (a) the total number of peaks called, (b) total number of base pairs called significant, (c) base pair overlap of published 50,000-cell ATAC-seq data, 500-cell ATAC-seq/EzTn5 data and published 500-cell ATAC-seq data against ENCODE accessibility data from UW and (d) base

pair overlap of published 50,000-cell ATAC-seq data, 500-cell ATAC-seq/EzTn5 data and published 500-cell ATAC-seq data against ENCODE accessibility data from Duke.

**Supplementary Figure 21 description:**

200 kb view of accessible chromatin in ATAC-seq/EzTn5 data versus published ATAC-seq data. 500-cell ATAC-seq/EzTn5 data was compared to published 50,000-cell ATAC-seq data, and published 500-cell ATAC-seq data. 500-cell ATAC-seq/EzTn5 data was generated using modified protocols with optimized tagmentation buffer and protease digestion of proteins and transposase. ENCODE accessibility data and histone modifications which are often found near regulatory elements and promoters are also depicted. All samples were down sampled to the same number of unique reads, 8,351,125, before viewing tracks.

Supp. Figure 1

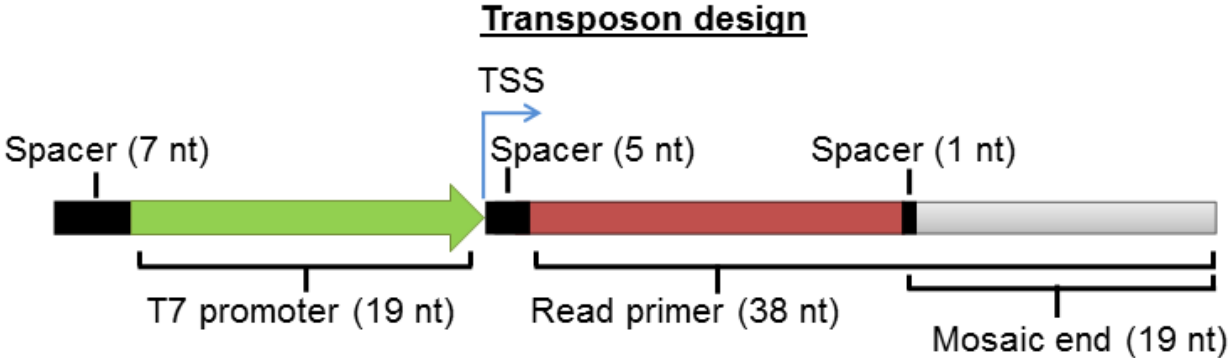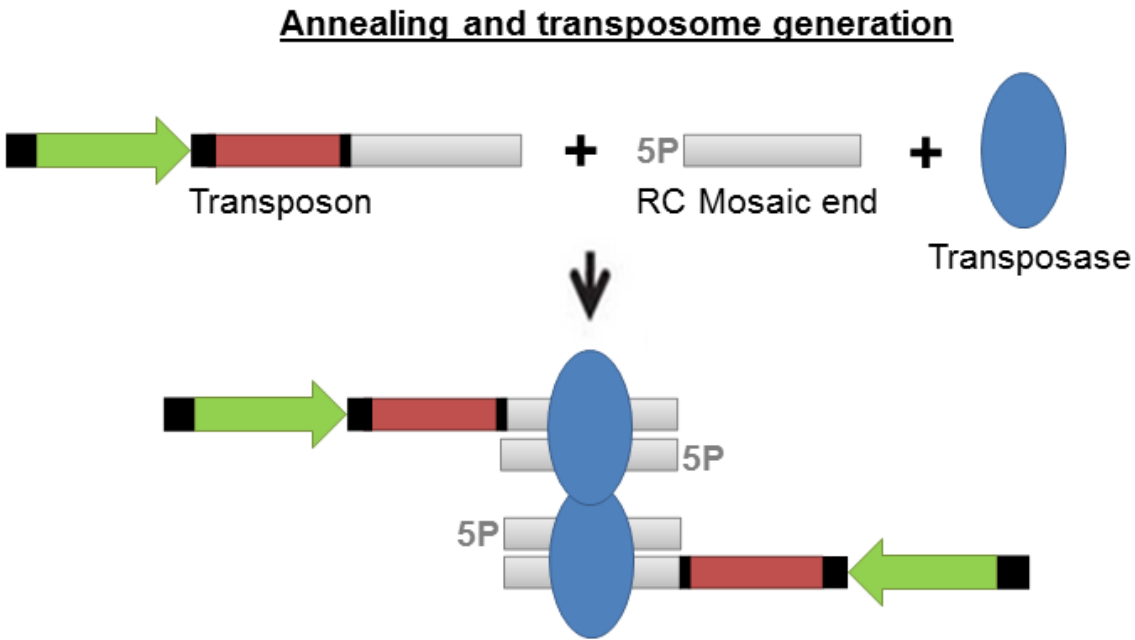

Supp. Figure 2

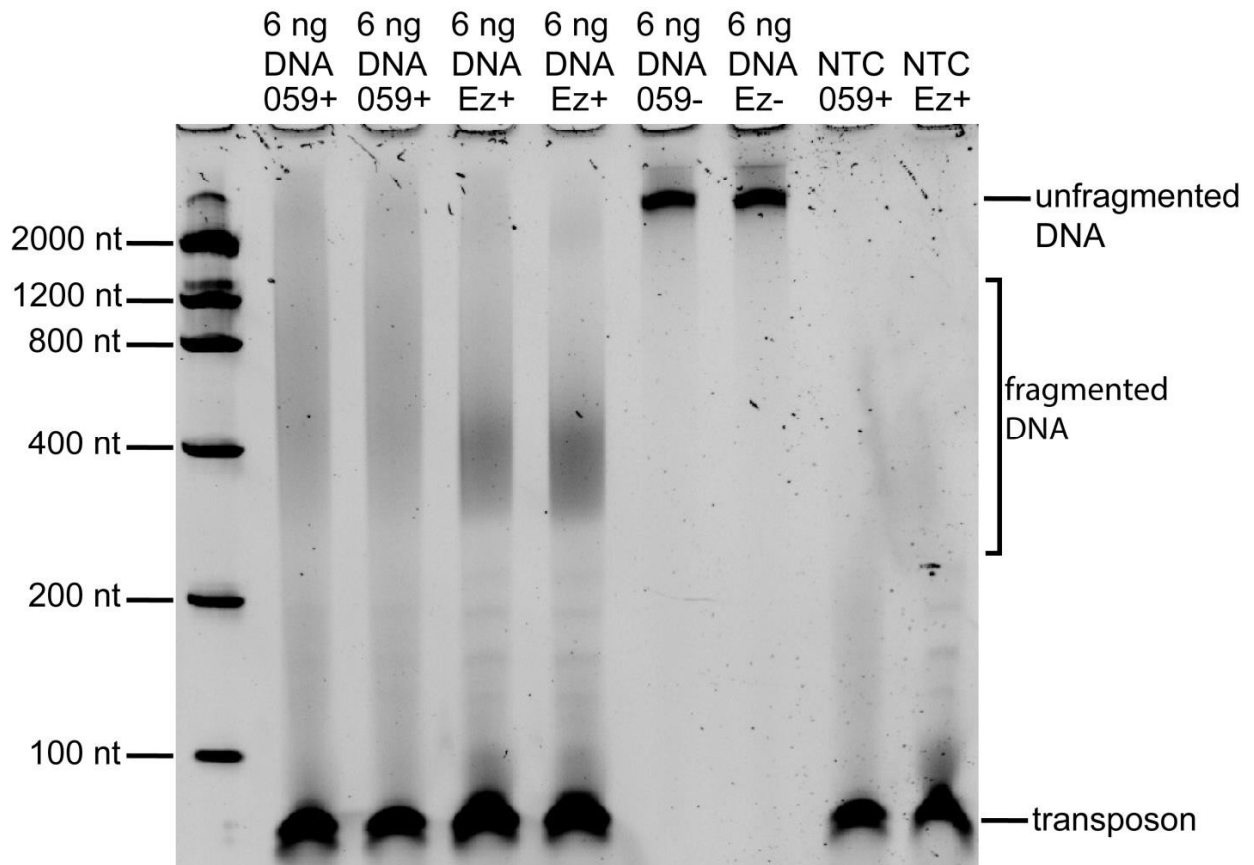

Supp. Figure 3

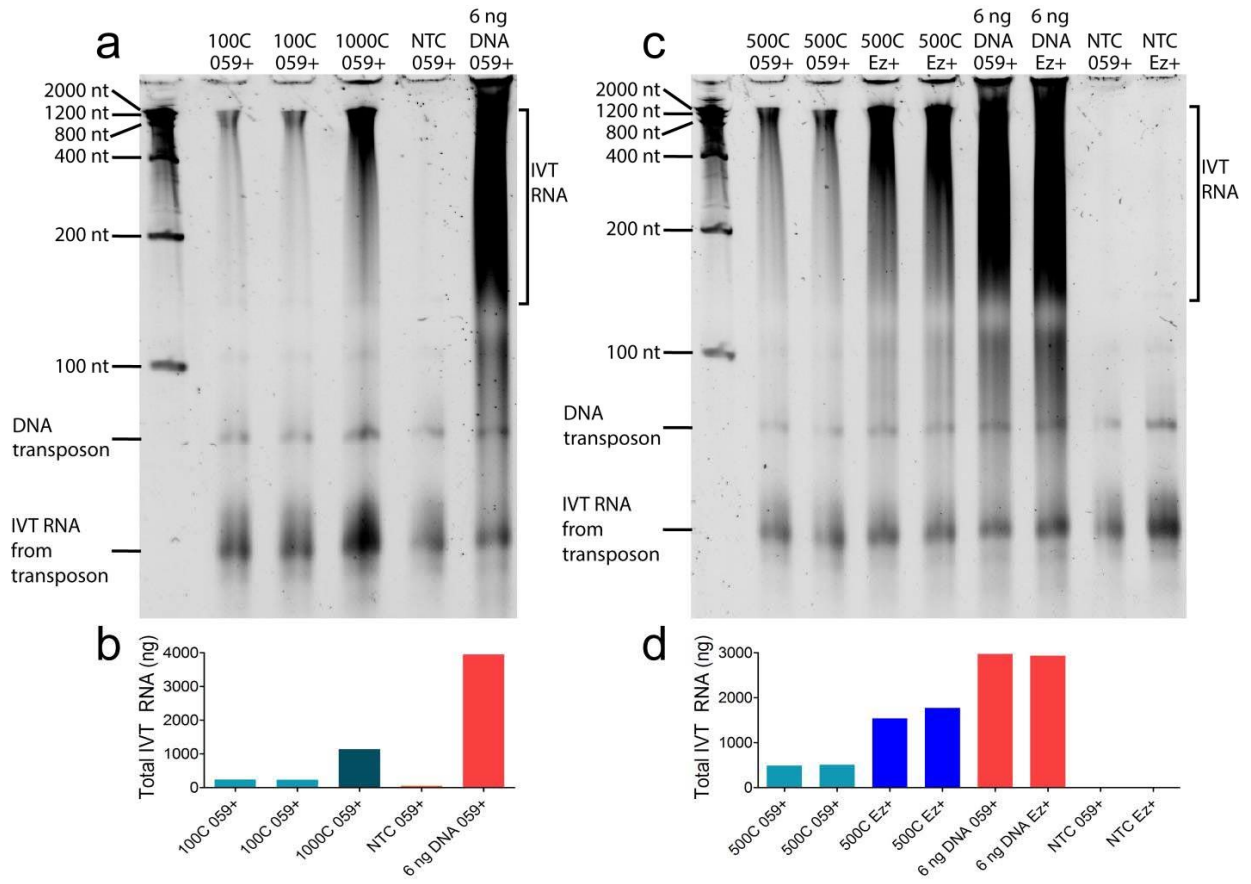

Supp. Figure 4

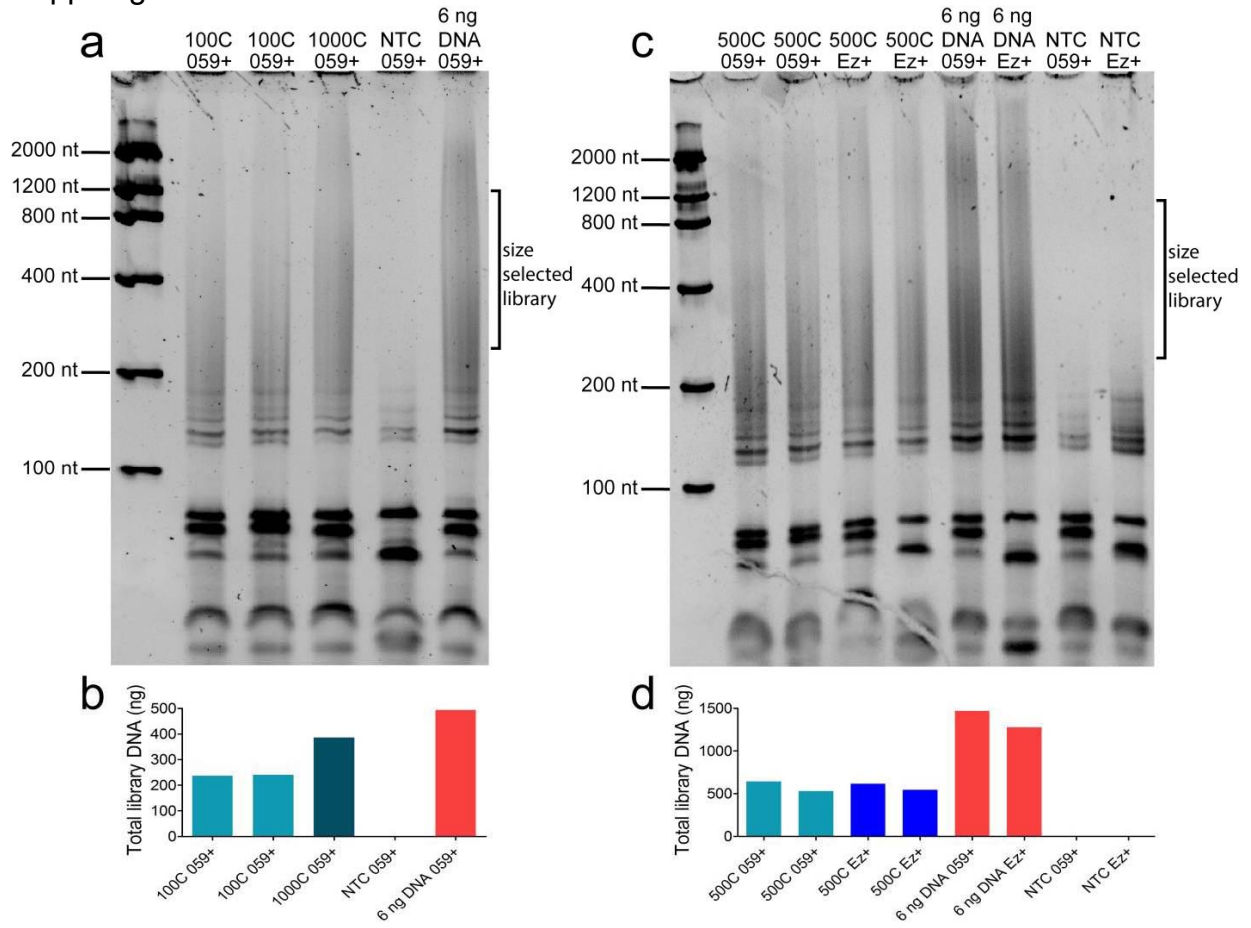

Supp. Figure 5

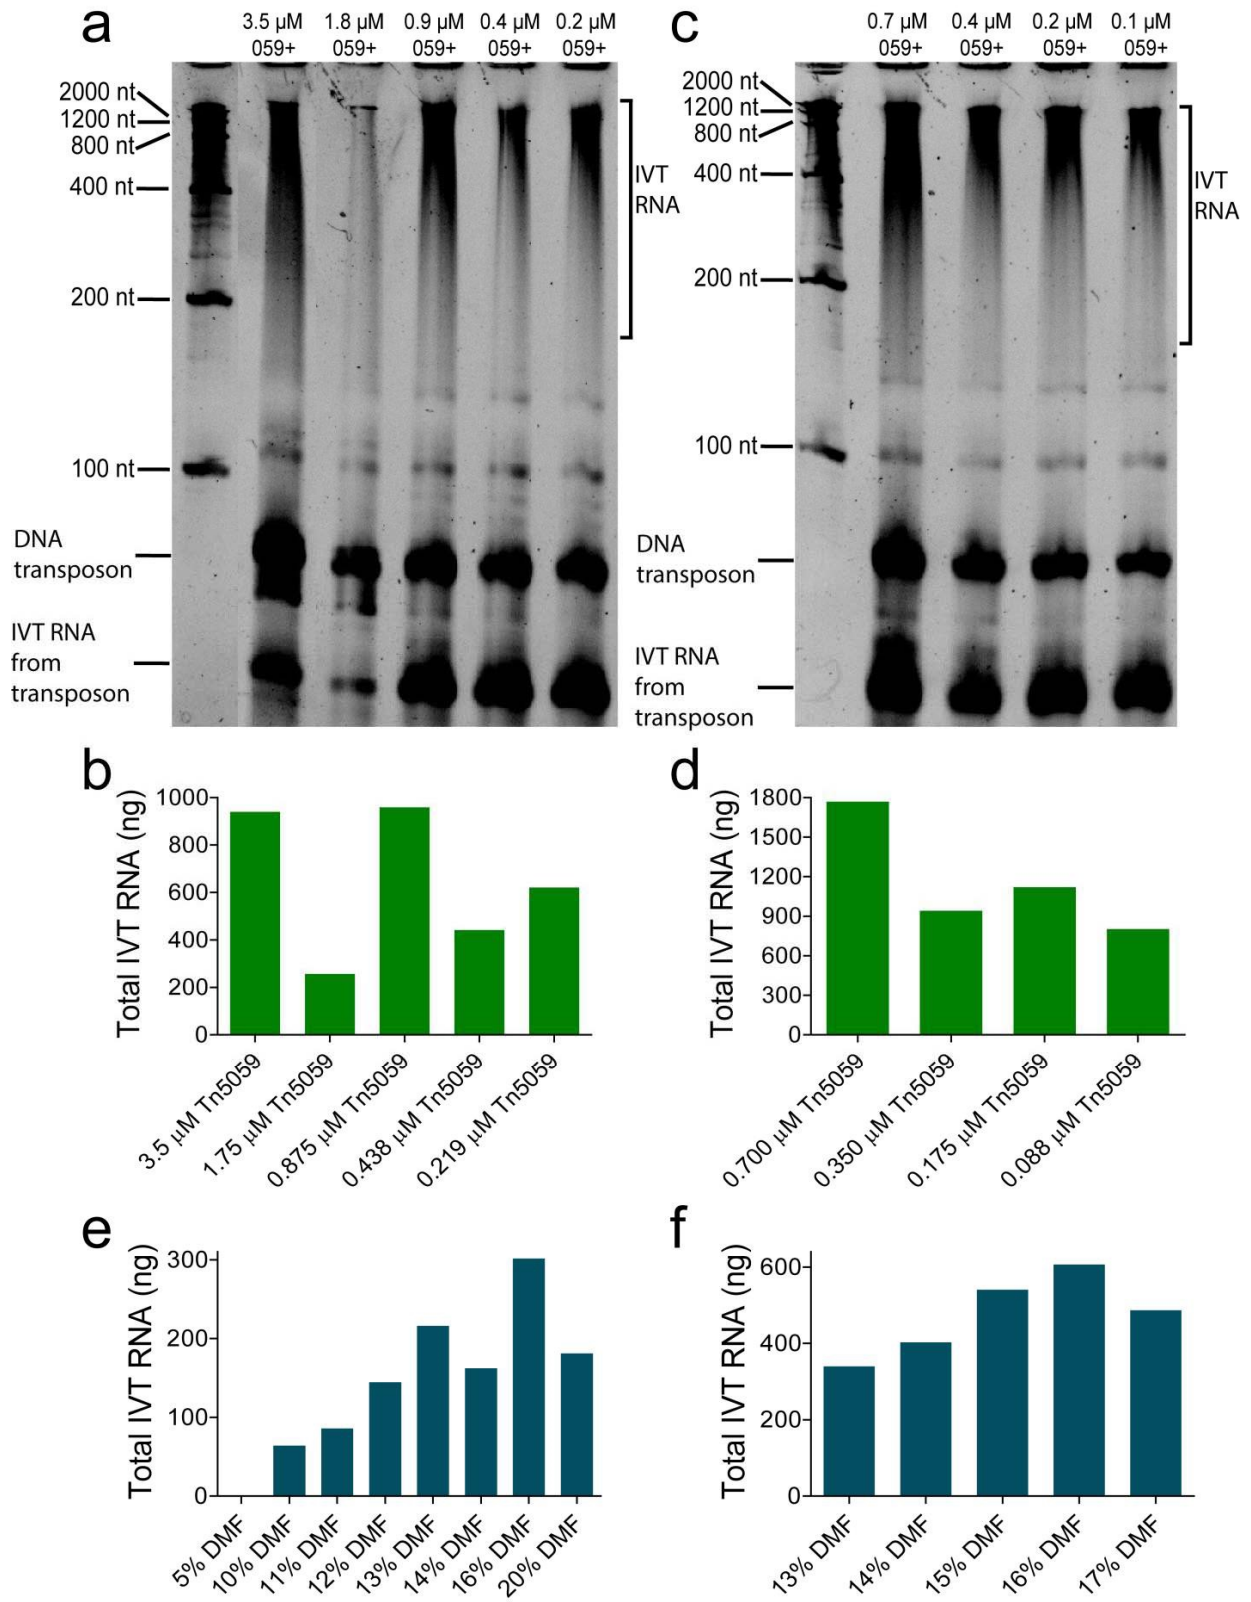

Supp. Figure 6

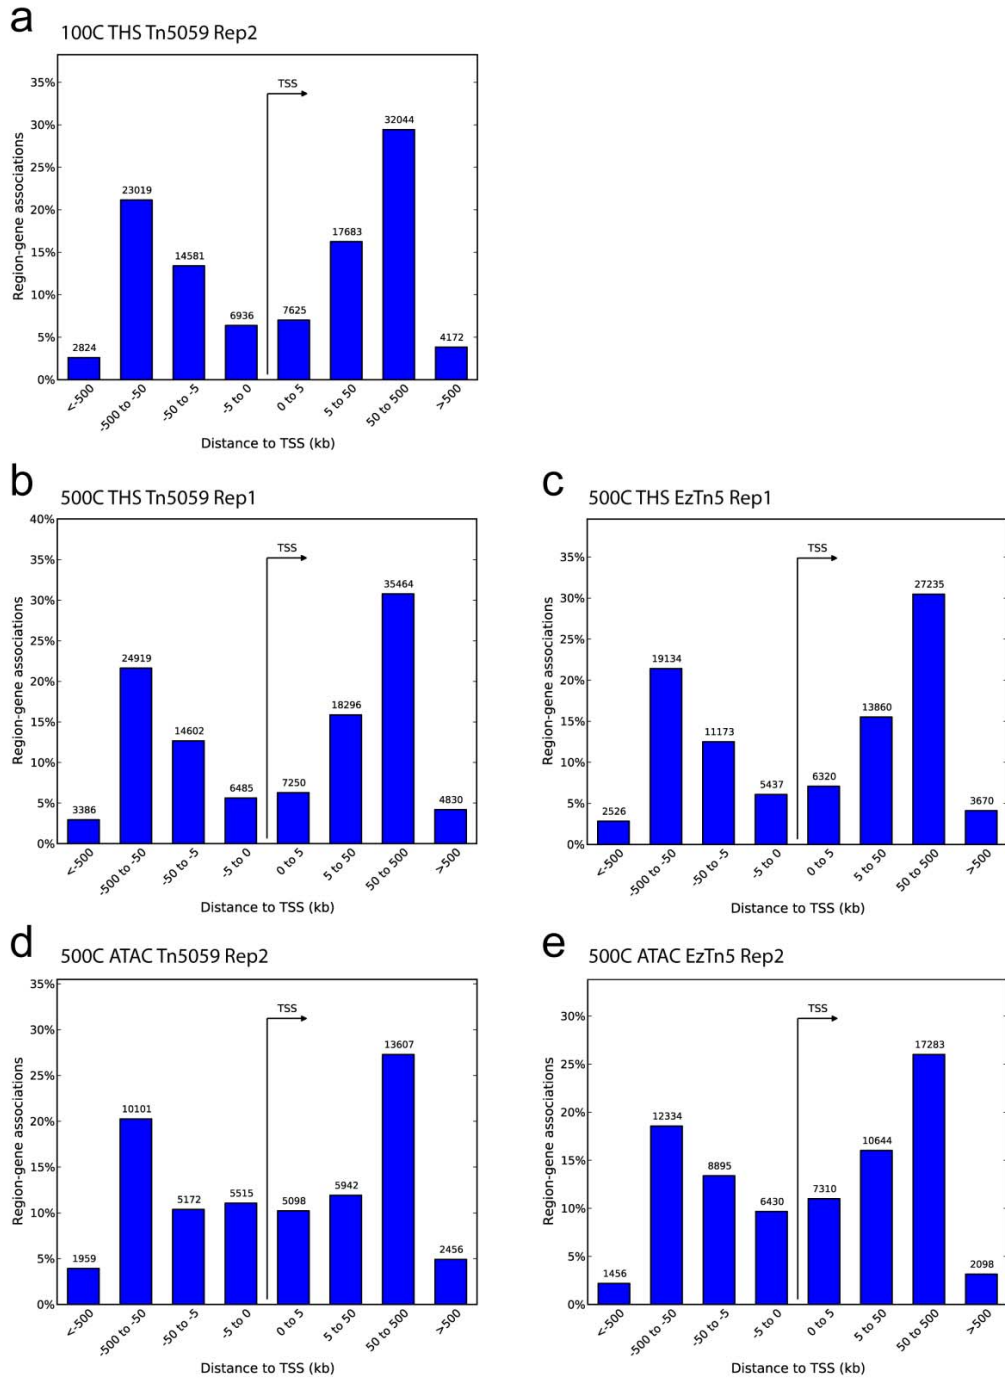



Supp. Figure 7

**a** 100C THS Tn5059 Rep2

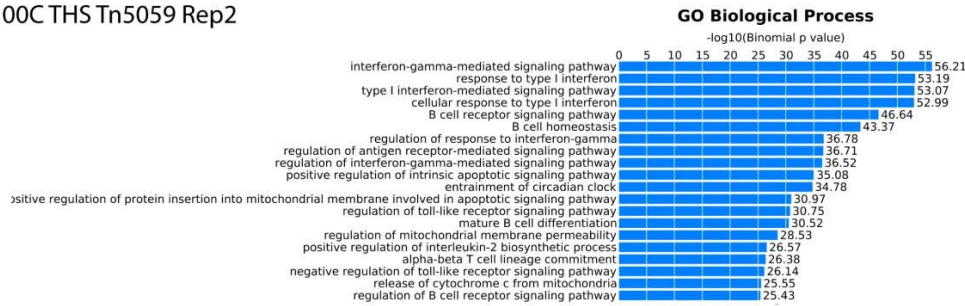

**b** 500C THS Tn5059 Rep1

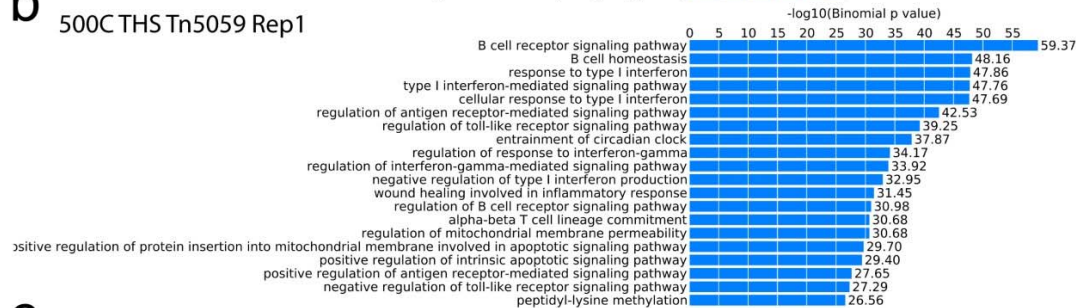

**c** 500C THS EzTn5 Rep1

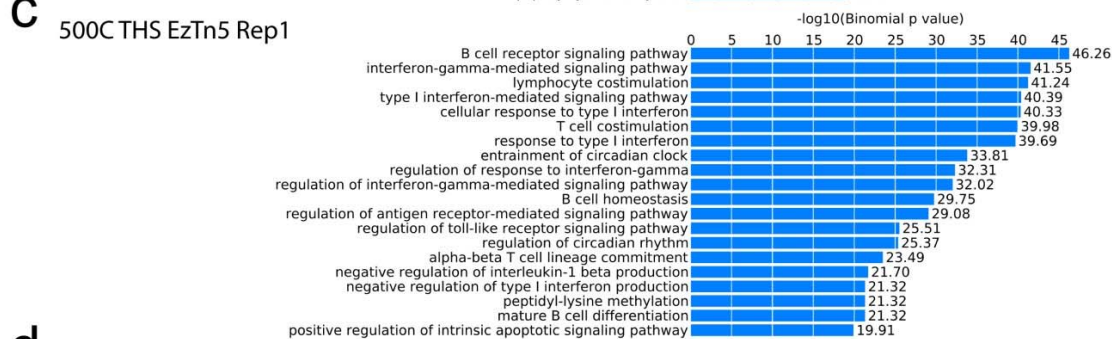

**d** 500C ATAC Tn5059 Rep2

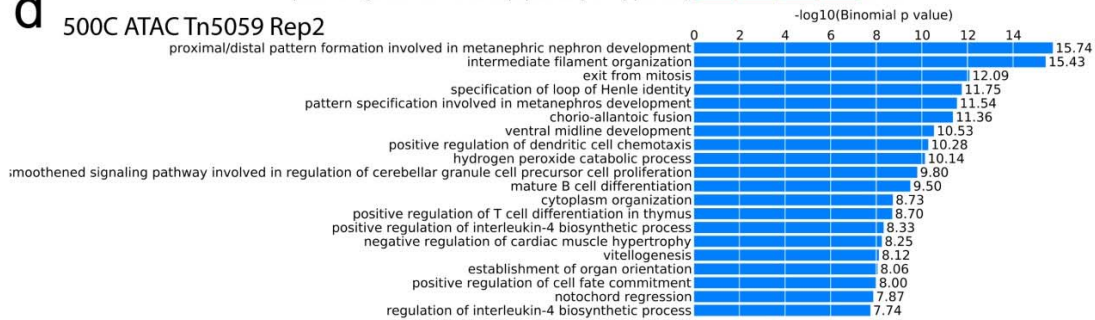

**e** 500C ATAC EzTn5 Rep2

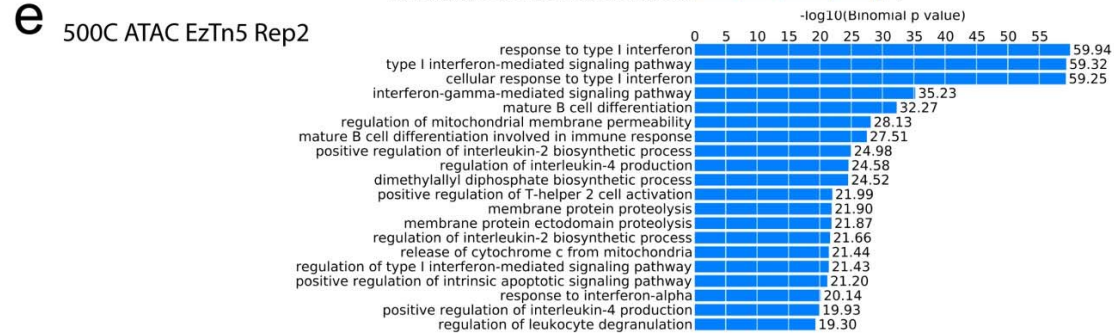

Supp. Figure 8

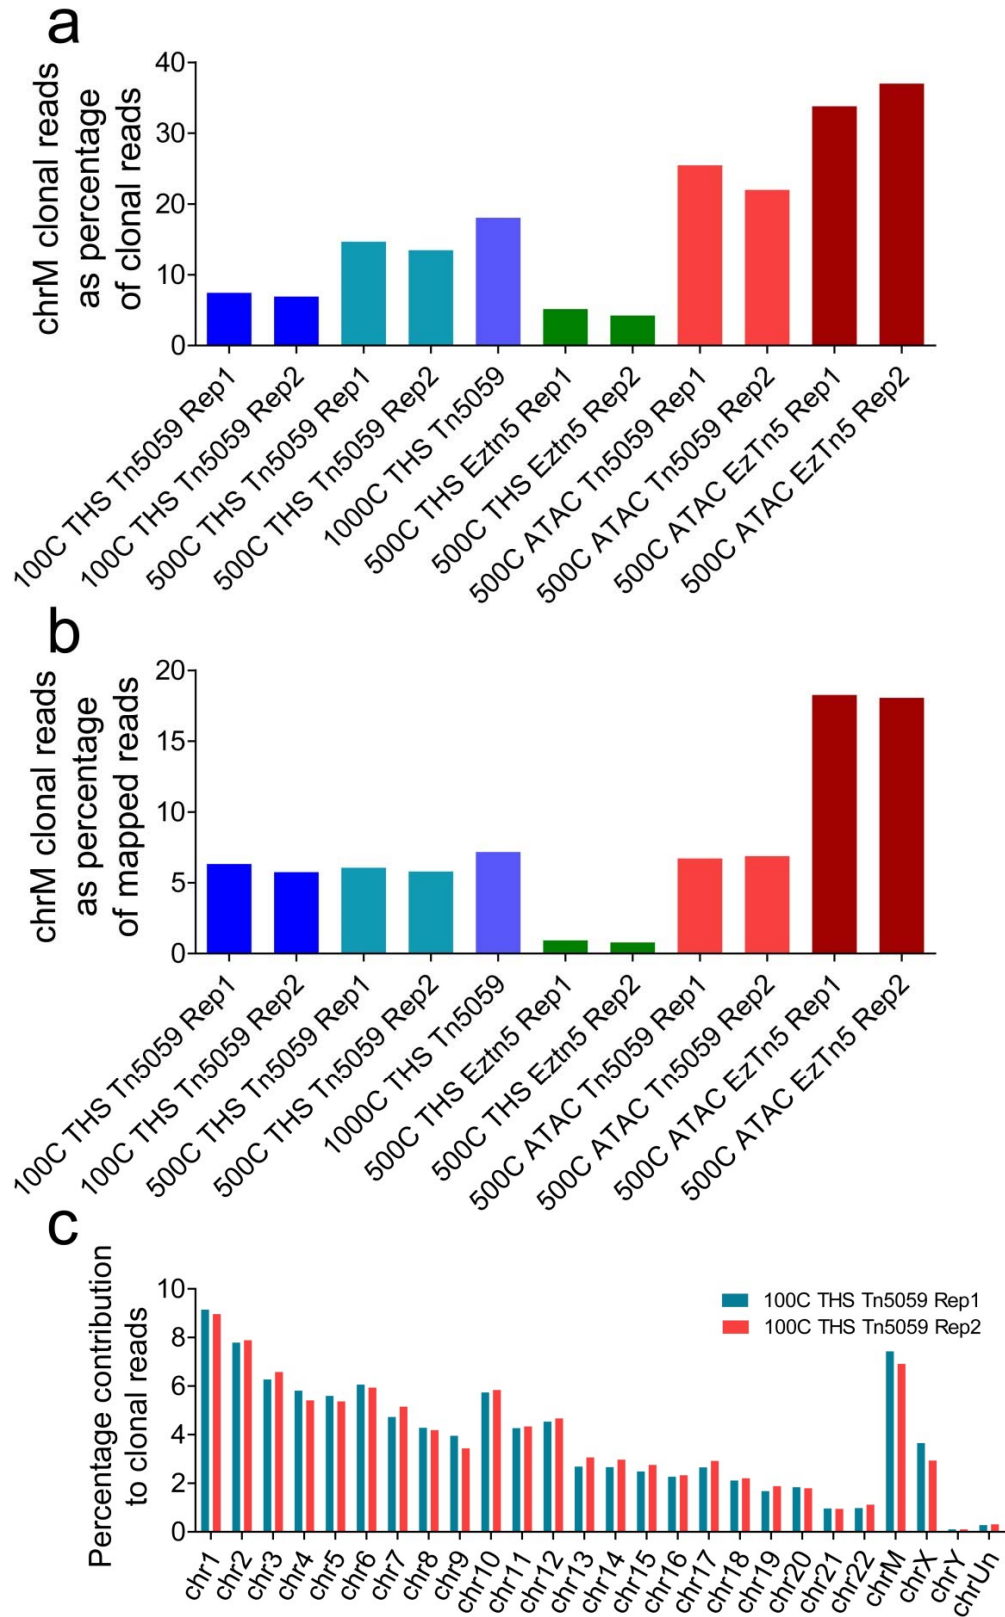

Supp. Figure 9

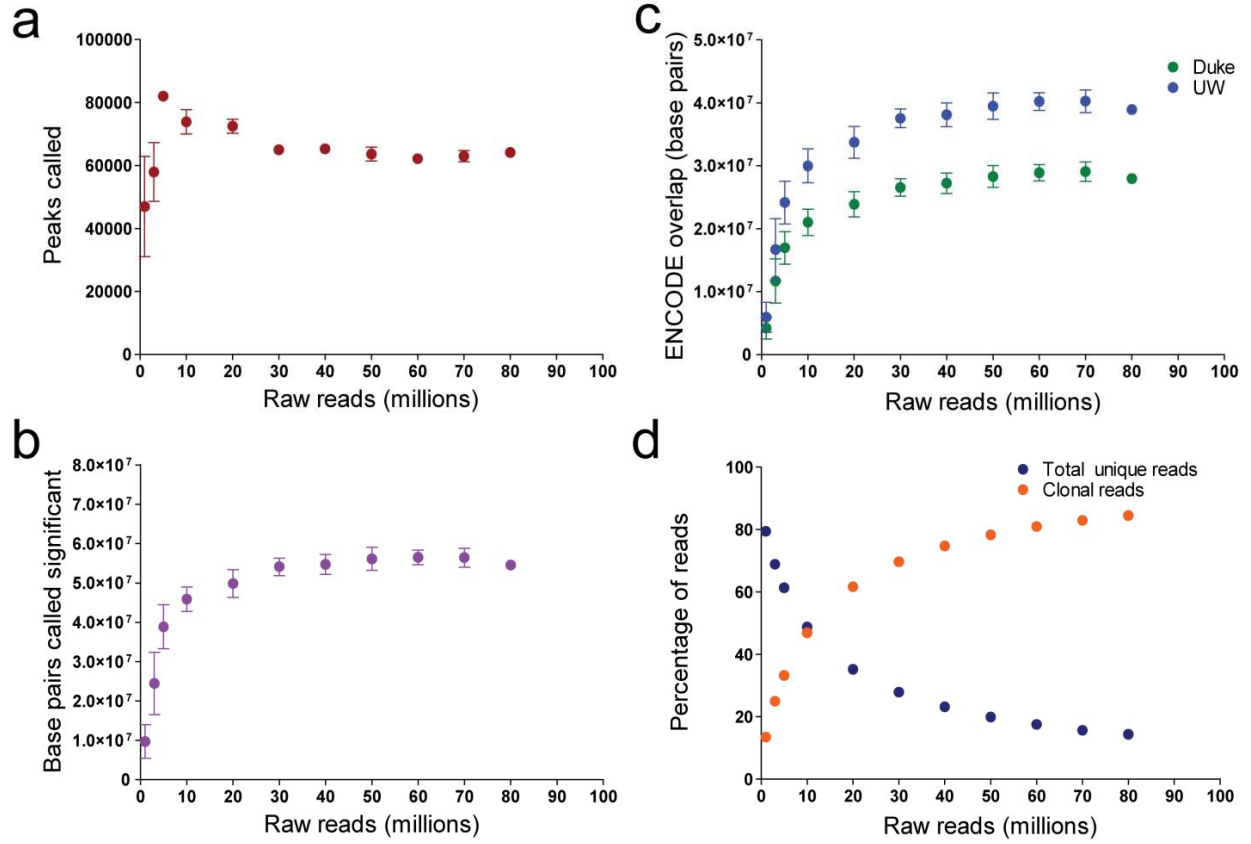

Supp. Figure 10

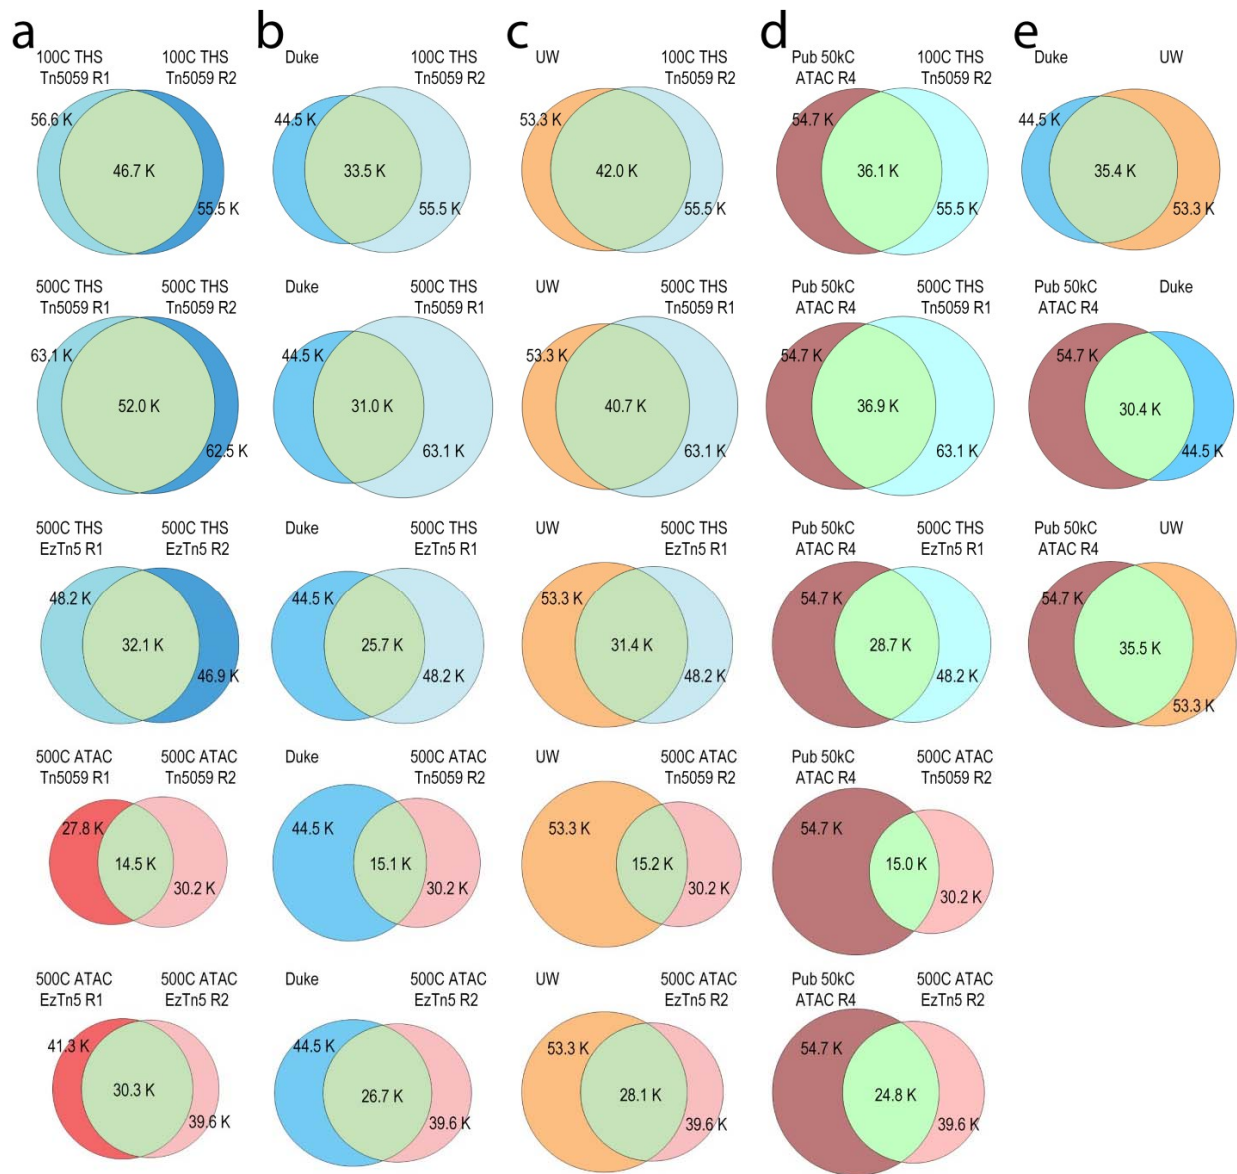

Supp. Figure 11

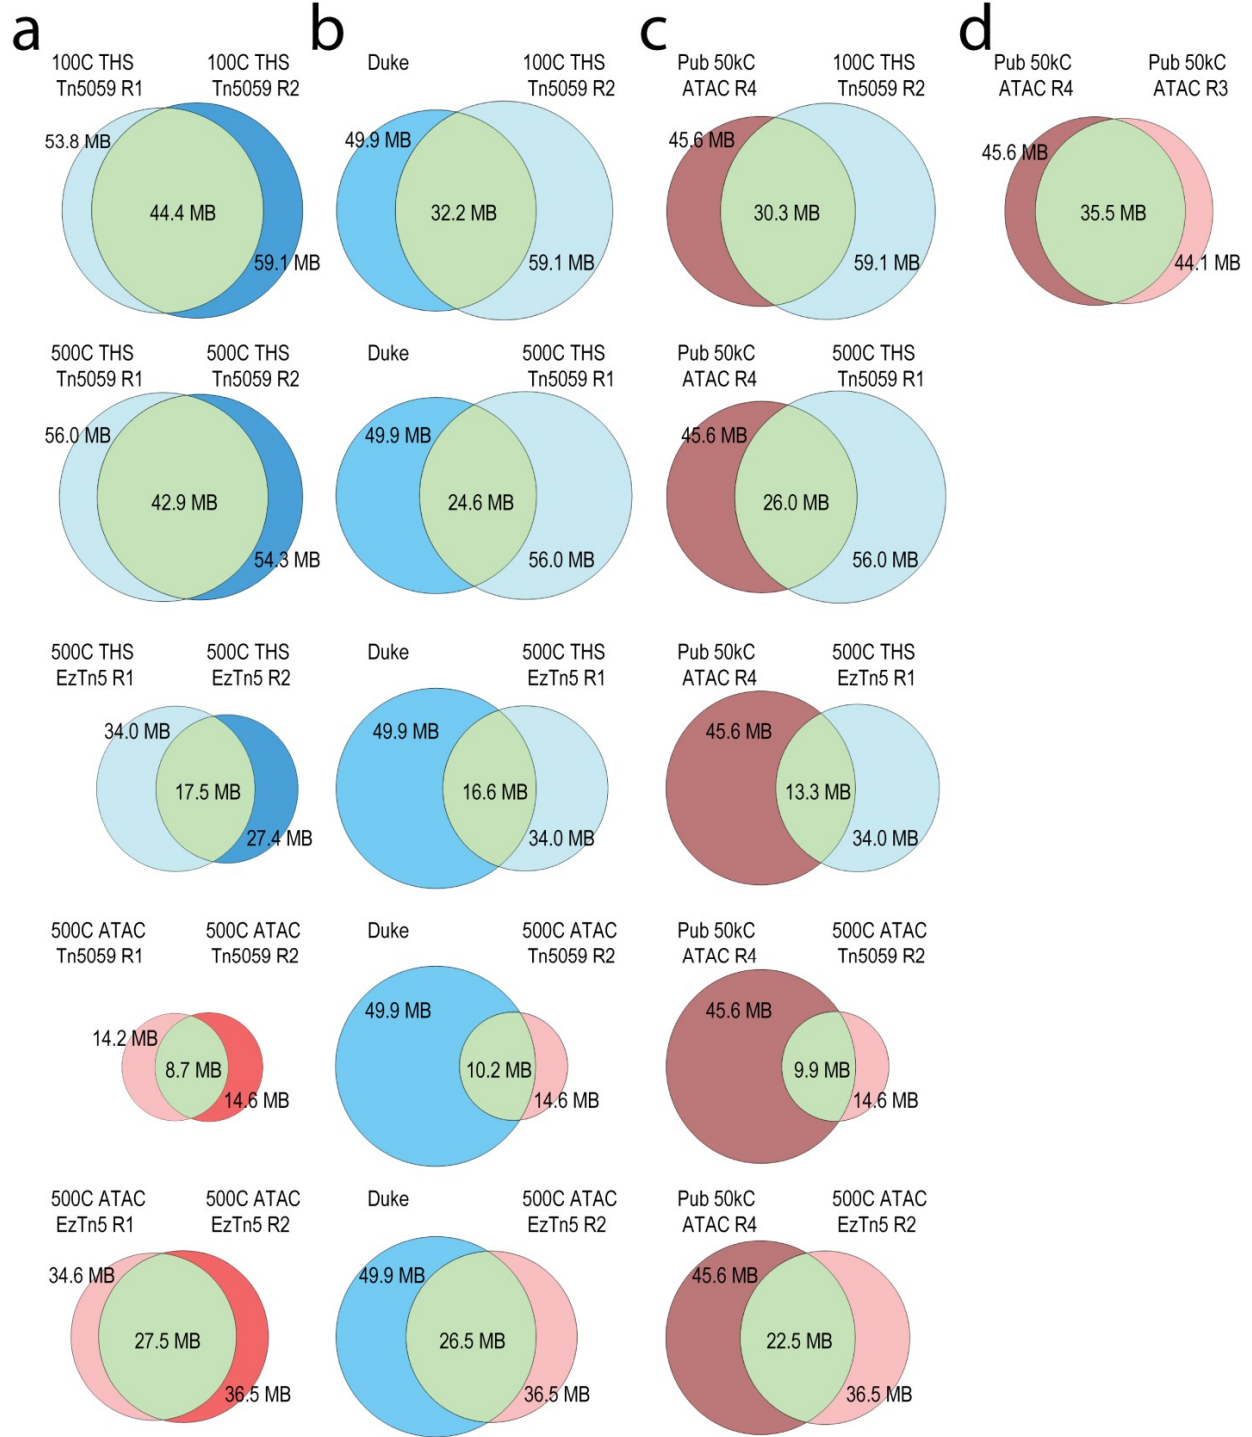

### Supp. Figure 12

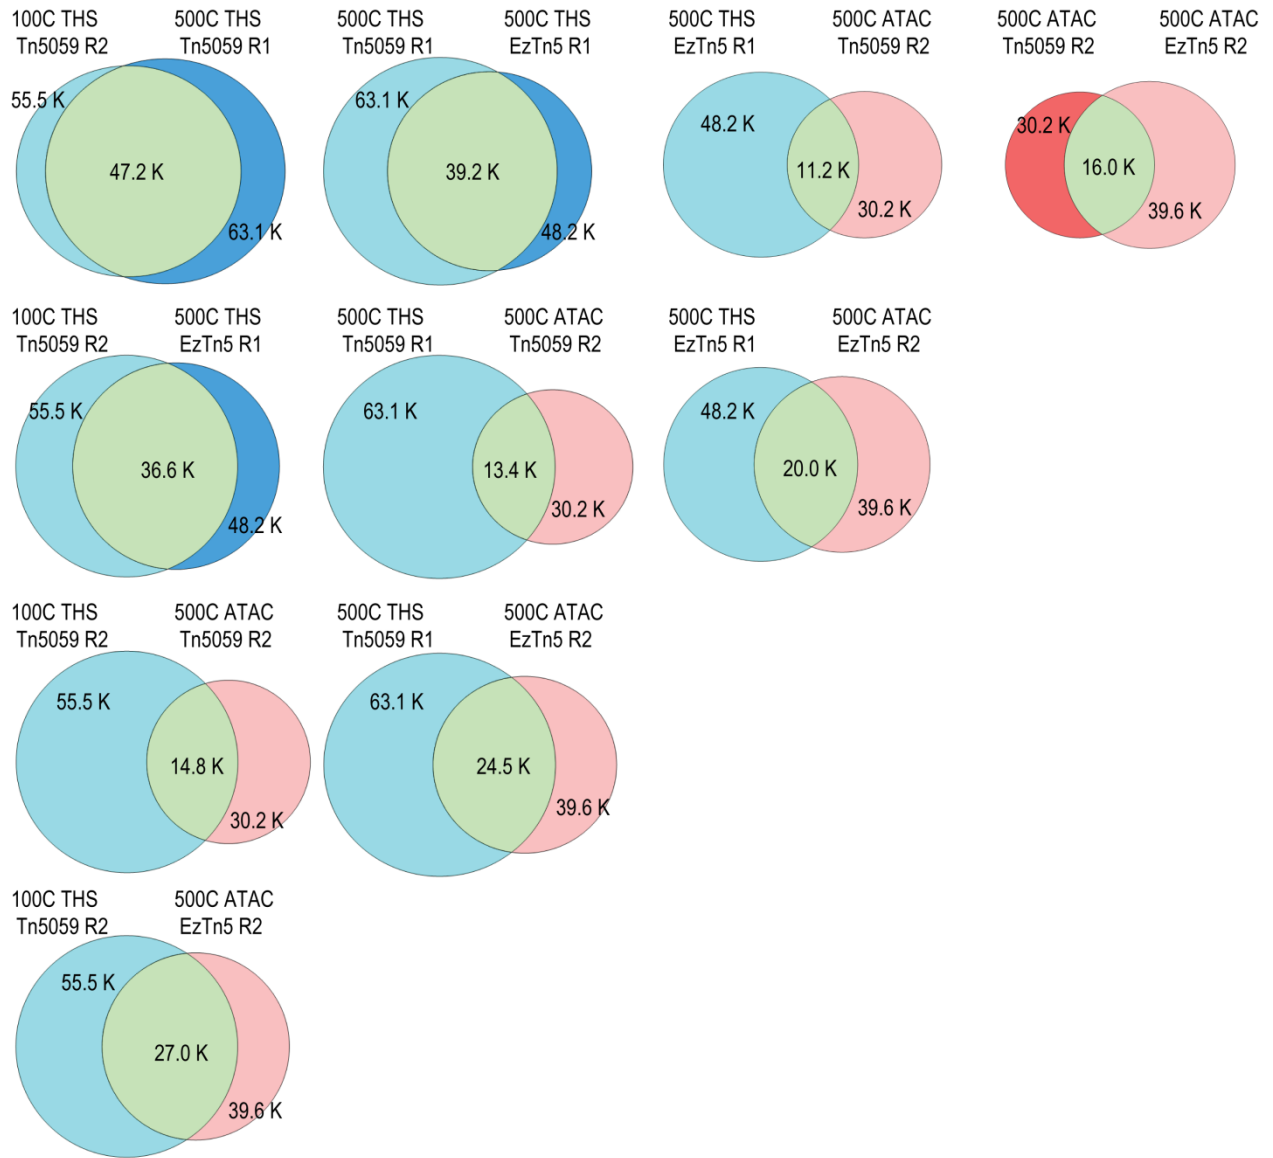

### Supp. Figure 13

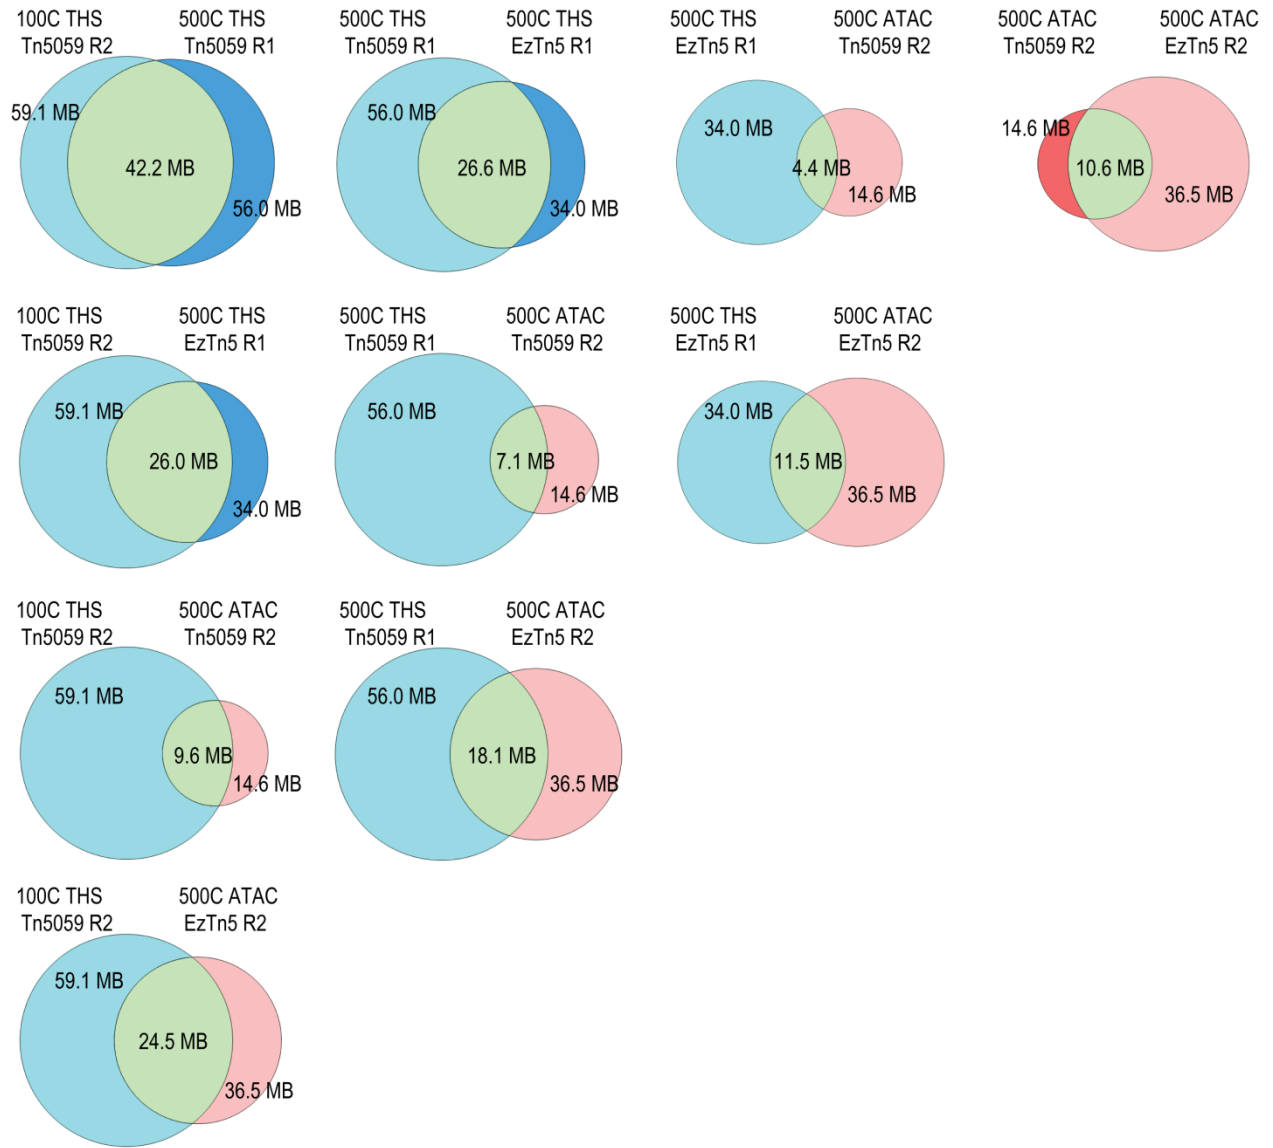

Supp. Figure 14

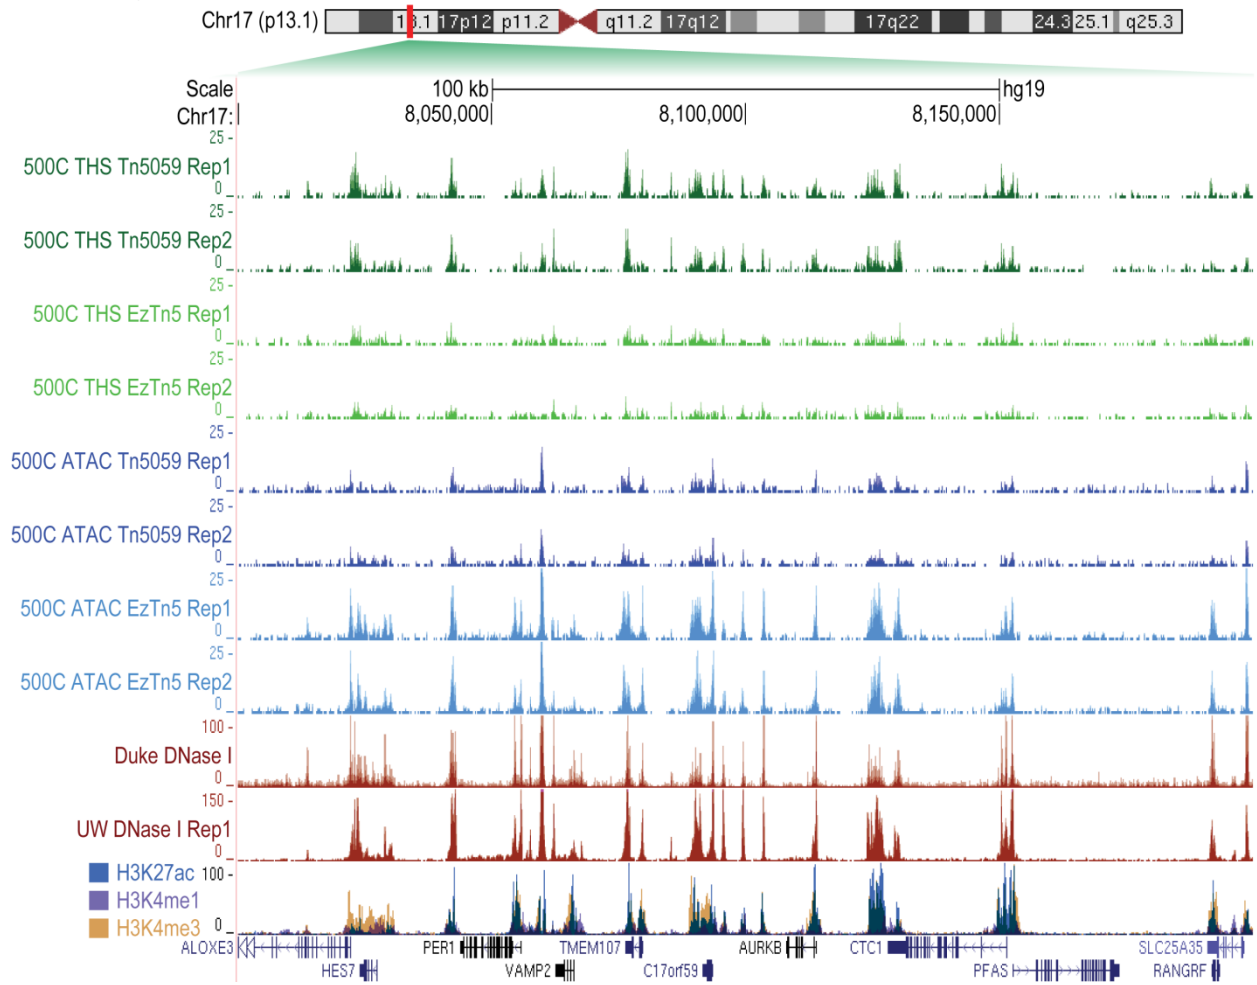



Supp. Figure 15

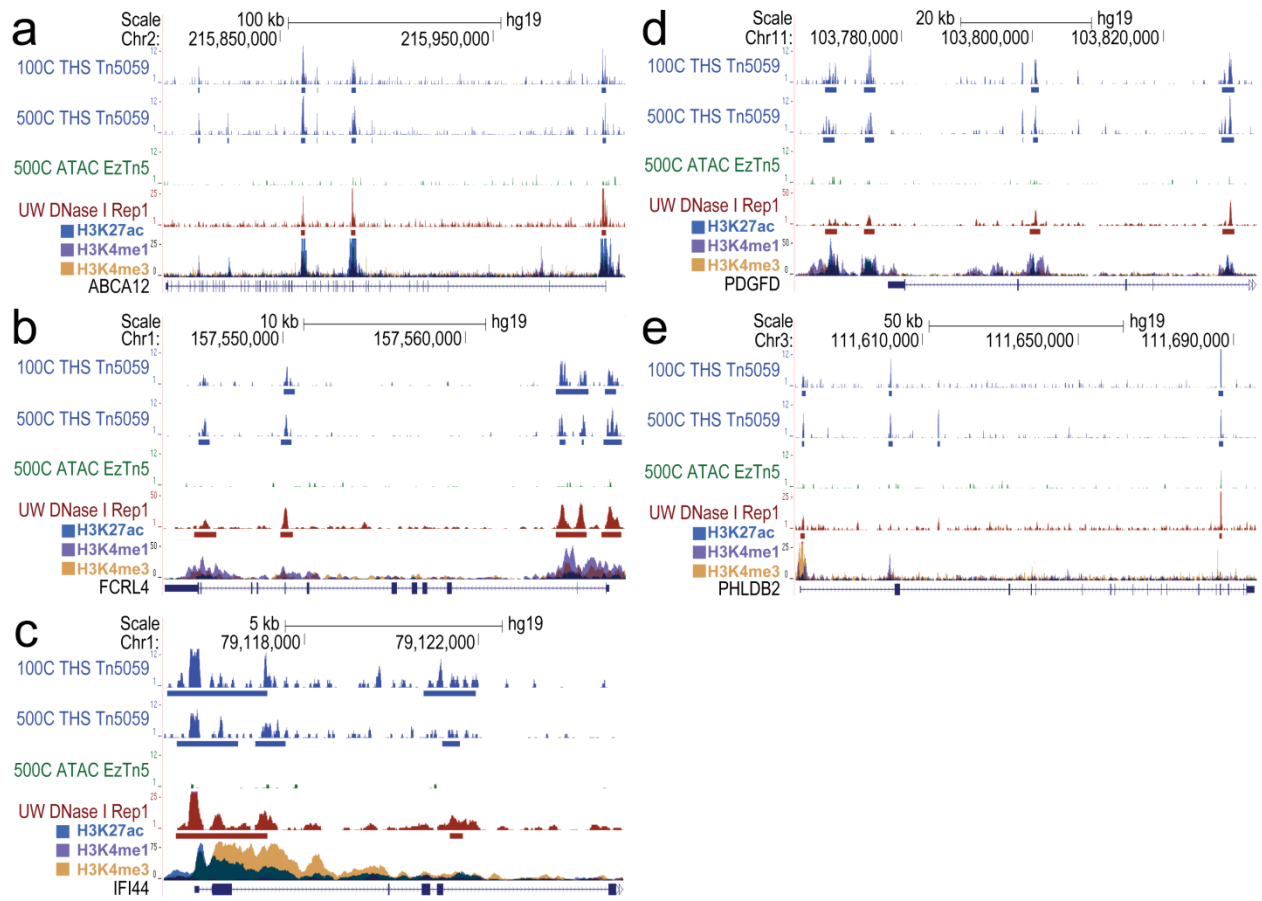

Supp. Figure 16

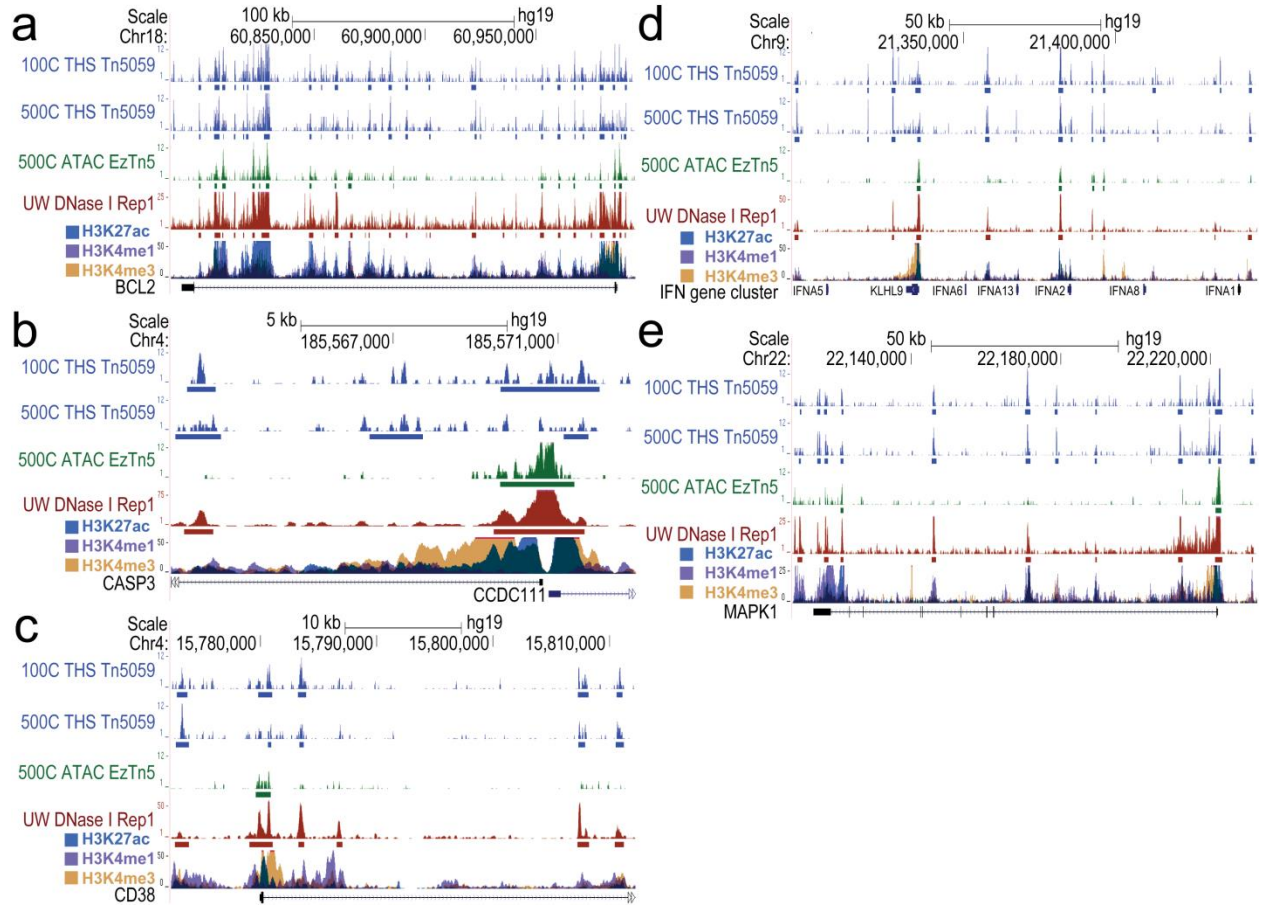

Supp. Figure 17

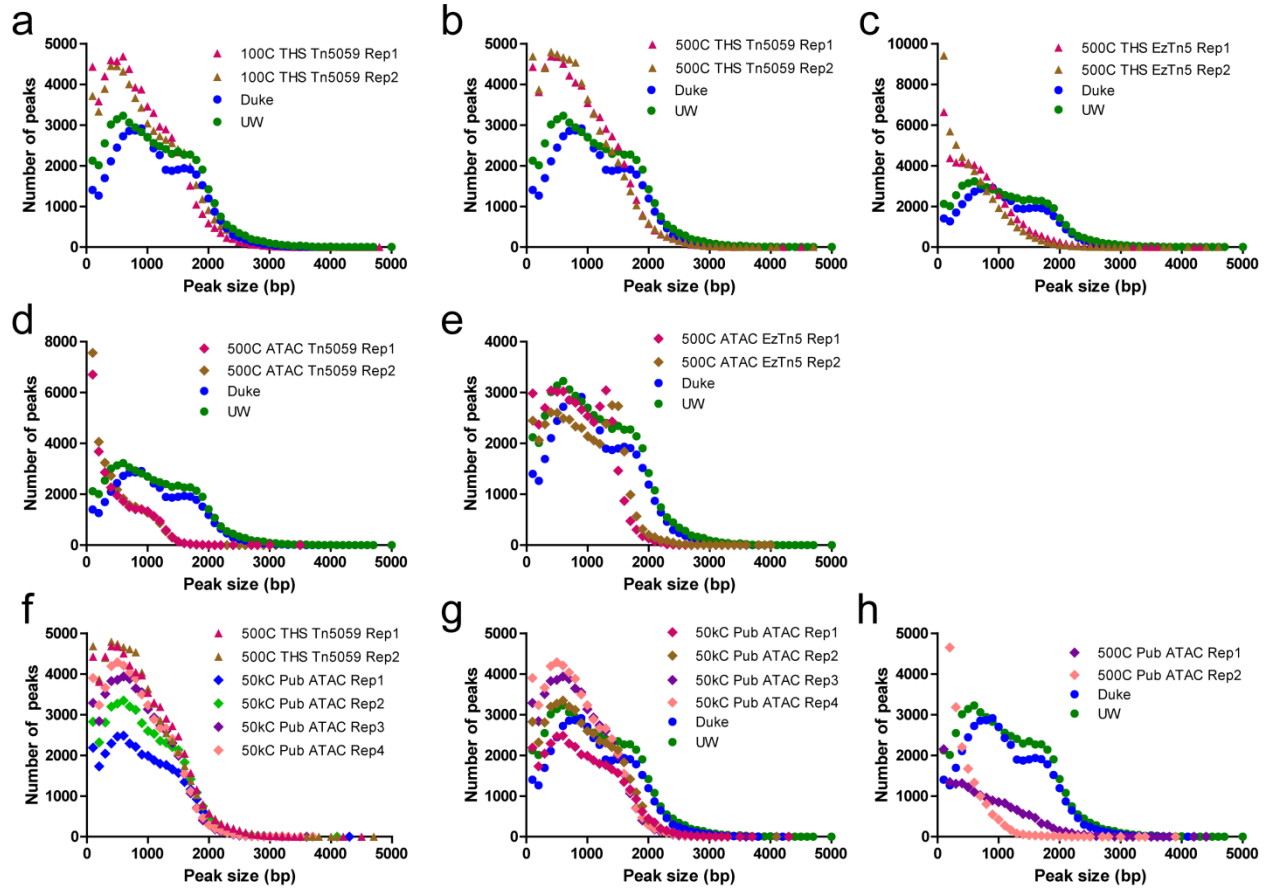

Supp. Figure 18

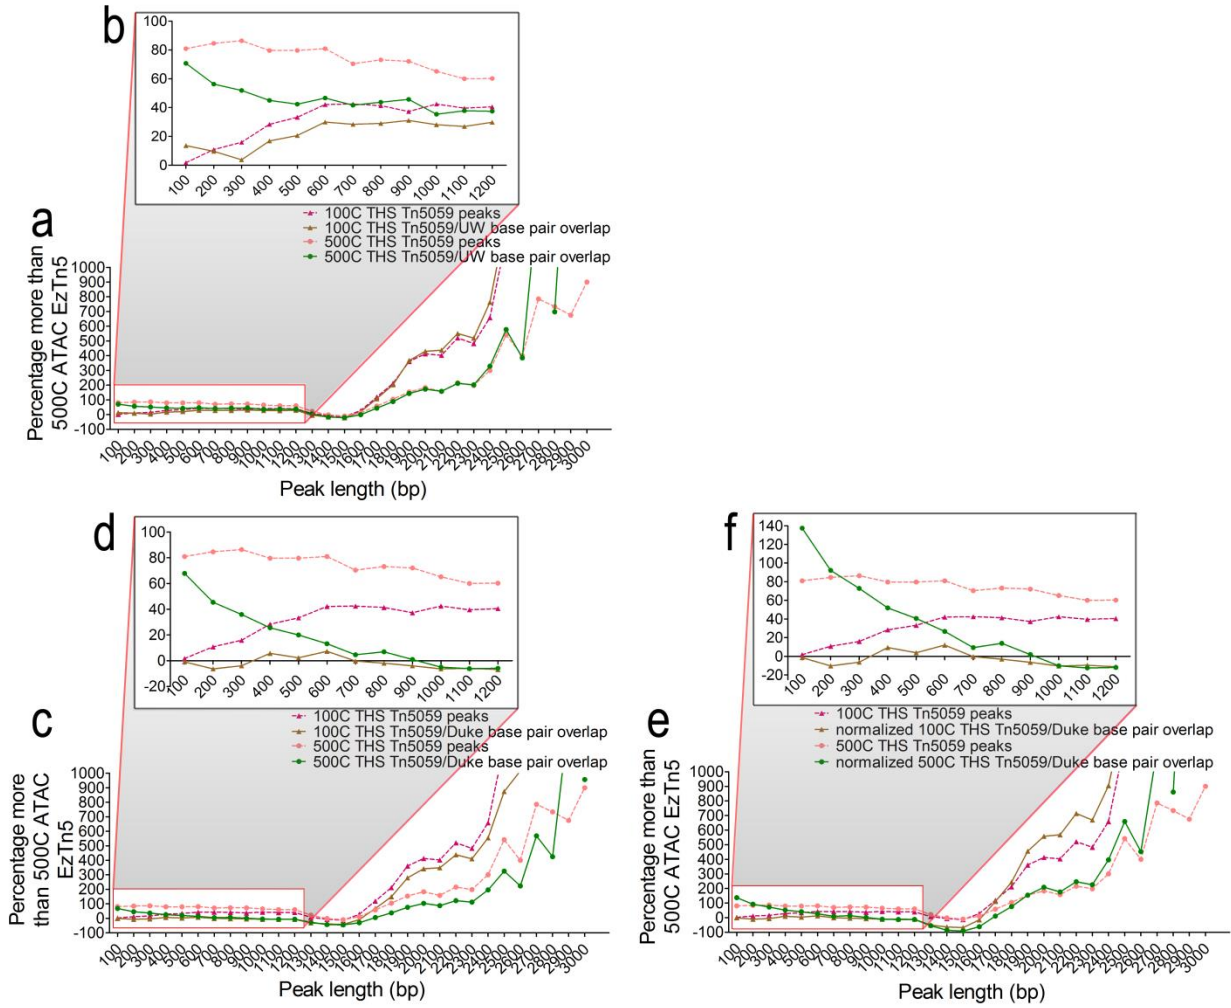

Supp. Figure 19

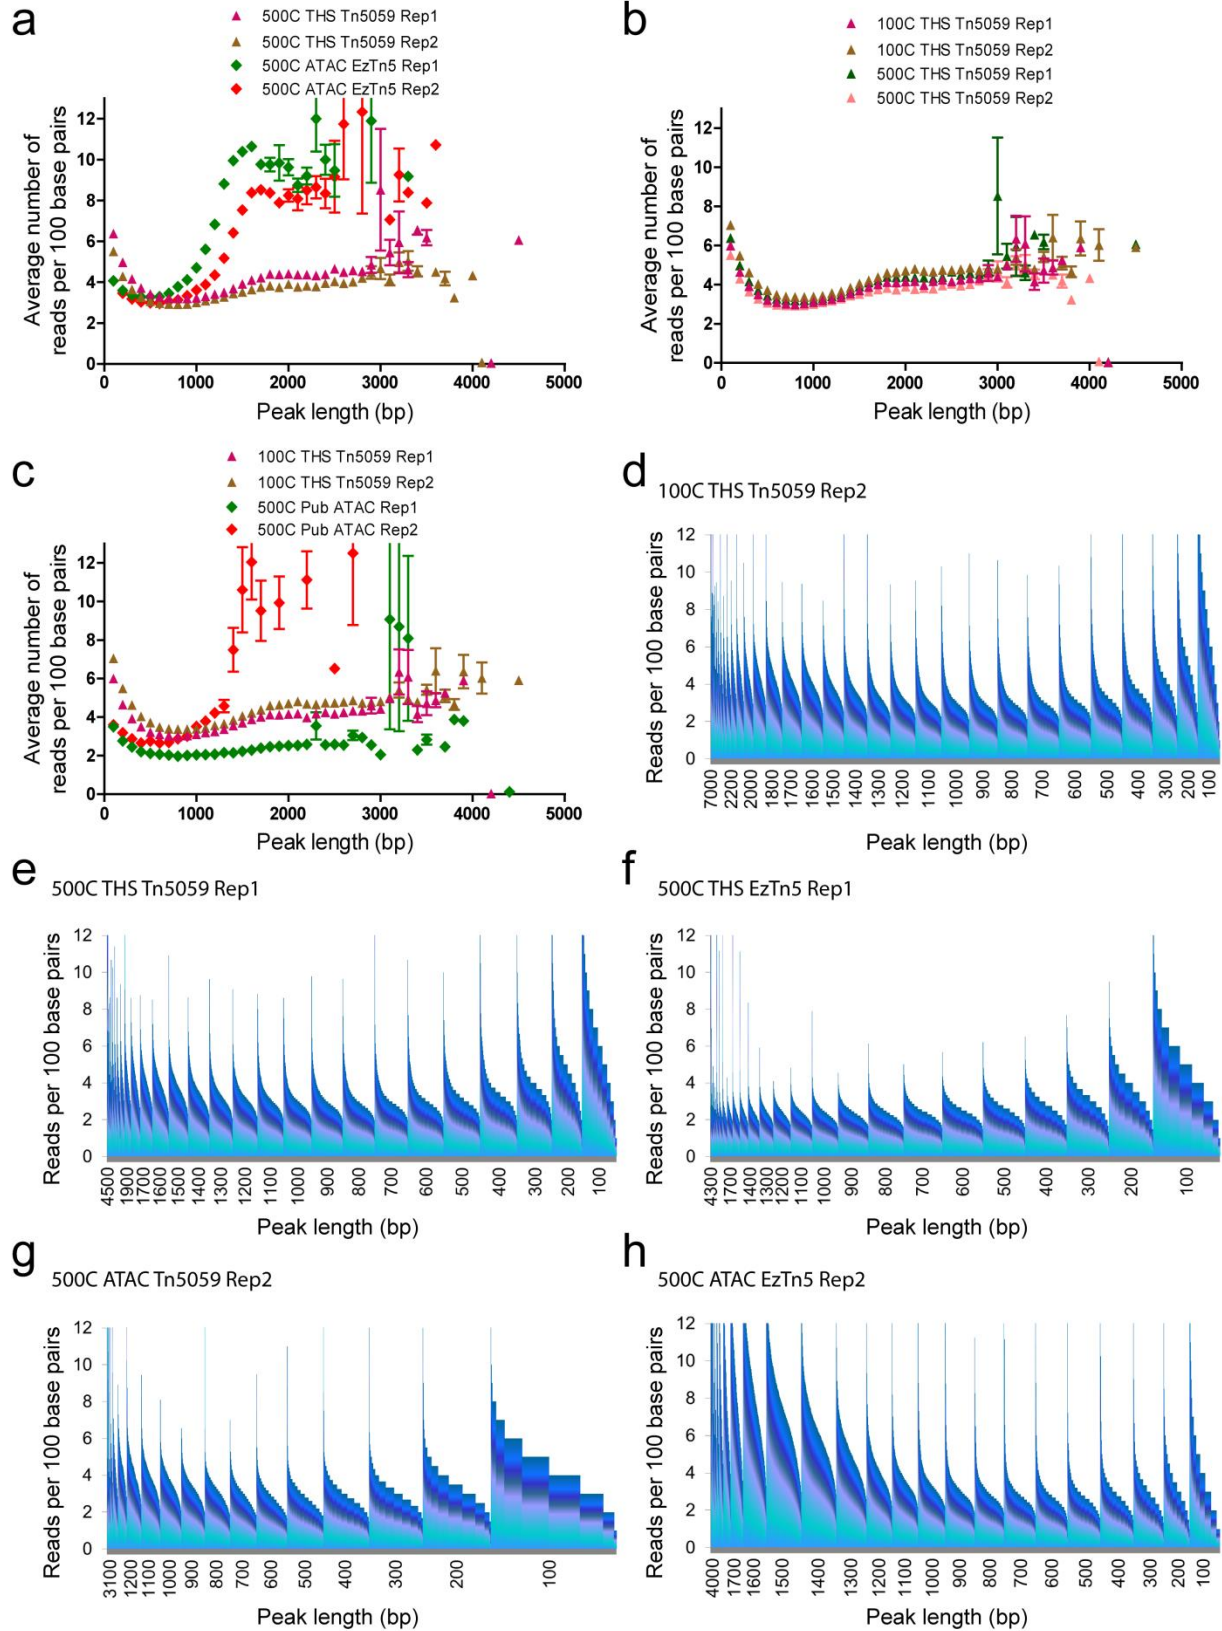

Supp. Figure 20

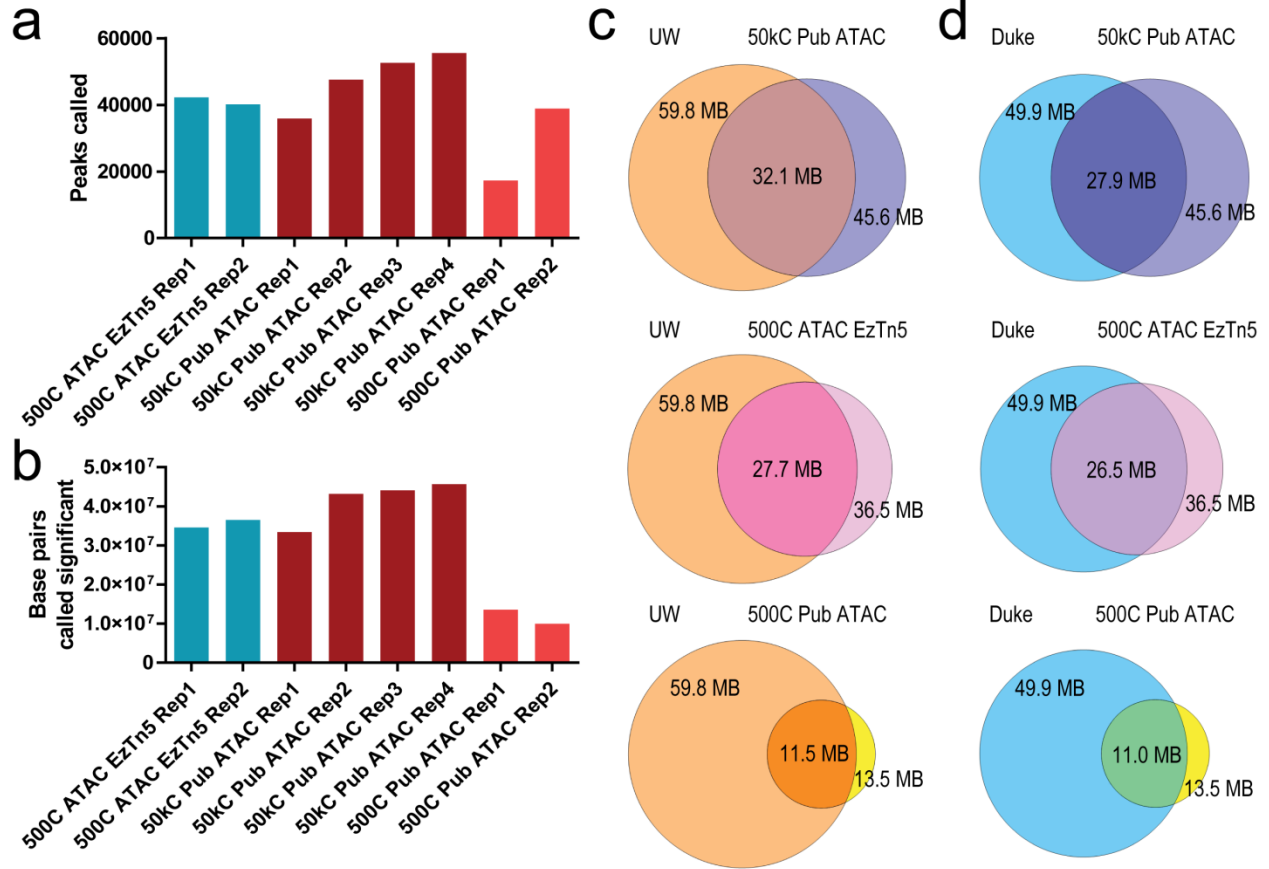

Supp. Figure 21

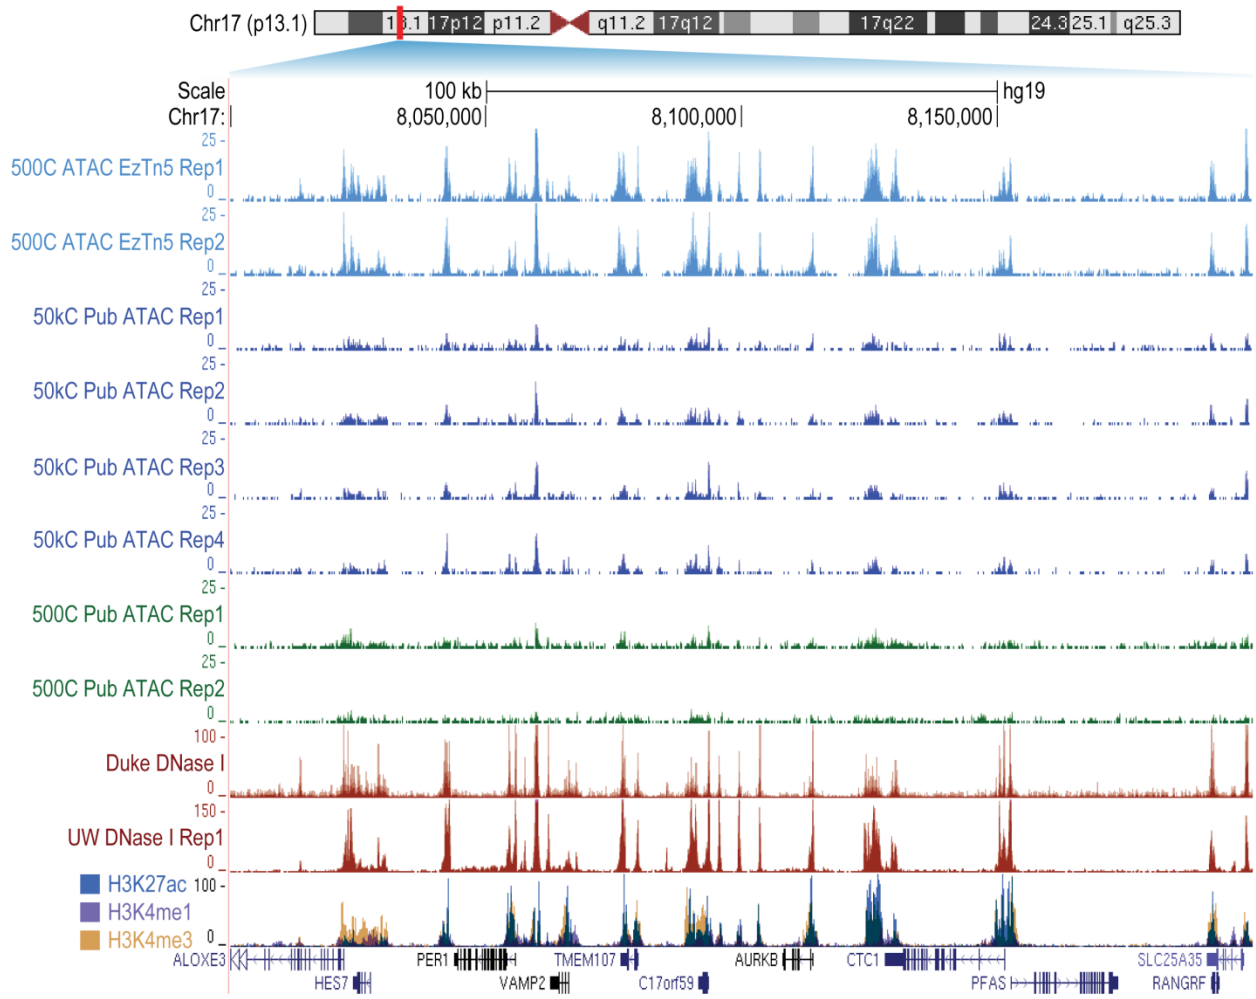

Supp. Table 1

| Sample                                                                                                                    | Total reads | Mapped reads | Mapped % | Clonal reads | Clonal % | Total unique reads | Unique reads % | Peaks  |
|---------------------------------------------------------------------------------------------------------------------------|-------------|--------------|----------|--------------|----------|--------------------|----------------|--------|
| 100C_THS_Tn5059_Rep1                                                                                                      | 83,435,049  | 77,241,514   | 92.58%   | 65,637,161   | 84.98%   | 11,604,353         | 13.91%         | 63,485 |
| 100C_THS_Tn5059_Rep2                                                                                                      | 71,513,373  | 65,130,466   | 91.07%   | 54,213,284   | 83.24%   | 10,917,182         | 15.27%         | 62,316 |
| 1000C_THS_Tn5059                                                                                                          | 28,062,259  | 26,669,972   | 95.04%   | 10,598,651   | 39.74%   | 16,071,321         | 57.27%         | 68,584 |
| NTC_THS_Tn5059                                                                                                            | 195,832     | 7,674        | 3.92%    | 323          | 4.21%    | 7,351              | 3.75%          | -      |
| 6_ng_pure_DNA_THS_Tn5059                                                                                                  | 13,816,259  | 12,953,563   | 93.76%   | 1,098,757    | 8.48%    | 11,854,806         | 85.80%         | 22,213 |
| Replicate in each sample set with the most number of base pairs called significant (Total coverage) was used for analysis |             |              |          |              |          |                    |                |        |

| Sample                   | Total coverage | Duke overlap | UW overlap | Duke % overlap | UW % overlap |
|--------------------------|----------------|--------------|------------|----------------|--------------|
| 100C_THS_Tn5059_Rep1     | 55,039,700     | 28,235,051   | 39,333,337 | 56.59%         | 65.80%       |
| 100C_THS_Tn5059_Rep2     | 58,602,500     | 30,593,381   | 41,951,208 | 61.32%         | 70.18%       |
| 1000C_THS_Tn5059         | 57,903,800     | 24,580,506   | 36,671,014 | 49.27%         | 61.34%       |
| NTC_THS_Tn5059           | -              | -            | -          | -              | -            |
| 6_ng_pure_DNA_THS_Tn5059 | 3,898,500      | 76,350       | 182,964    | 0.15%          | 0.31%        |



SuppTable 2

| Peak size (bp) | 100C THS Tn5059 Rep1 | 100C THS Tn5059 Rep2 | 500C THS Tn5059 Rep1 | 500C THS Tn5059 Rep2 | 500C THS EzTn5 Rep1 | 500C THS EzTn5 Rep2 | 500C ATAC Tn5059 Rep1 | 500C ATAC Tn5059 Rep2 | 500C ATAC EzTn5 Rep1 | 500C ATAC EzTn5 Rep2 | 50kC Pub ATAC Rep1 | 50kC Pub ATAC Rep2 | 50kC Pub ATAC Rep3 | 50kC Pub ATAC Rep4 |
|----------------|----------------------|----------------------|----------------------|----------------------|---------------------|---------------------|-----------------------|-----------------------|----------------------|----------------------|--------------------|--------------------|--------------------|--------------------|
| 7000           | -                    | -                    | -                    | -                    | -                   | -                   | -                     | -                     | -                    | -                    | -                  | -                  | -                  | -                  |
| 6900           | -                    | -                    | -                    | -                    | -                   | -                   | -                     | -                     | -                    | -                    | -                  | -                  | -                  | -                  |
| 6800           | -                    | -                    | -                    | -                    | -                   | -                   | -                     | -                     | -                    | -                    | -                  | -                  | -                  | -                  |
| 6700           | 1                    | 1                    | -                    | -                    | -                   | -                   | -                     | -                     | -                    | -                    | -                  | -                  | -                  | -                  |
| 6300           | 1                    | -                    | -                    | -                    | -                   | -                   | -                     | -                     | -                    | -                    | -                  | -                  | -                  | -                  |
| 6200           | -                    | 1                    | -                    | -                    | -                   | -                   | -                     | -                     | -                    | -                    | -                  | -                  | -                  | -                  |
| 5800           | 1                    | 1                    | -                    | -                    | -                   | -                   | -                     | -                     | -                    | -                    | -                  | -                  | -                  | -                  |
| 5500           | -                    | -                    | -                    | -                    | -                   | -                   | -                     | -                     | -                    | -                    | -                  | -                  | -                  | -                  |
| 5000           | -                    | -                    | -                    | -                    | -                   | -                   | -                     | -                     | -                    | -                    | -                  | -                  | -                  | -                  |
| 4800           | 1                    | 1                    | -                    | -                    | -                   | -                   | -                     | -                     | -                    | -                    | -                  | -                  | -                  | -                  |
| 4700           | 1                    | 3                    | -                    | 1                    | -                   | -                   | -                     | -                     | -                    | -                    | -                  | -                  | -                  | -                  |
| 4600           | 1                    | -                    | -                    | -                    | -                   | 1                   | -                     | -                     | -                    | -                    | -                  | -                  | -                  | -                  |
| 4500           | 1                    | -                    | 1                    | -                    | -                   | -                   | -                     | -                     | -                    | -                    | -                  | -                  | -                  | -                  |
| 4400           | 1                    | 1                    | -                    | -                    | -                   | 1                   | -                     | -                     | -                    | -                    | -                  | -                  | -                  | -                  |
| 4300           | -                    | 1                    | -                    | -                    | 1                   | -                   | -                     | -                     | -                    | -                    | 1                  | -                  | -                  | -                  |
| 4200           | 1                    | -                    | 1                    | -                    | 1                   | -                   | -                     | -                     | -                    | -                    | -                  | -                  | -                  | -                  |
| 4100           | -                    | -                    | -                    | 1                    | 1                   | 1                   | -                     | -                     | -                    | -                    | -                  | 1                  | -                  | -                  |
| 4000           | -                    | 2                    | -                    | 1                    | -                   | -                   | -                     | -                     | -                    | 1                    | -                  | -                  | -                  | -                  |
| 3900           | 3                    | 1                    | -                    | -                    | -                   | -                   | -                     | -                     | -                    | 1                    | -                  | -                  | -                  | -                  |
| 3800           | -                    | 1                    | -                    | 1                    | 1                   | 2                   | -                     | -                     | -                    | 2                    | -                  | -                  | -                  | -                  |
| 3700           | -                    | 5                    | -                    | 3                    | -                   | 1                   | -                     | -                     | -                    | -                    | 2                  | 2                  | -                  | 1                  |
| 3600           | 3                    | 2                    | -                    | 5                    | 1                   | -                   | -                     | -                     | -                    | 1                    | -                  | -                  | 2                  | -                  |
| 3500           | 4                    | 8                    | 2                    | 1                    | 1                   | -                   | 1                     | -                     | -                    | 1                    | 1                  | 1                  | -                  | 1                  |
| 3400           | 3                    | 14                   | 2                    | 9                    | 2                   | -                   | -                     | -                     | -                    | 2                    | -                  | -                  | -                  | -                  |
| 3300           | 8                    | 19                   | 6                    | 5                    | 1                   | 1                   | -                     | -                     | 1                    | 1                    | 3                  | 2                  | 1                  | 2                  |

|      |      |      |      |      |      |      |      |      |      |      |      |      |      |      |
|------|------|------|------|------|------|------|------|------|------|------|------|------|------|------|
| 3200 | 11   | 26   | 8    | 19   | 4    | -    | -    | -    | 2    | 5    | 9    | 7    | 3    | 5    |
| 3100 | 13   | 41   | 17   | 22   | 4    | 1    | -    | 1    | -    | 1    | 4    | 5    | 1    | 3    |
| 3000 | 25   | 64   | 20   | 20   | 10   | 2    | 2    | 1    | 2    | 2    | 11   | 9    | 6    | 4    |
| 2900 | 34   | 67   | 31   | 36   | 9    | 2    | -    | 1    | 4    | 4    | 17   | 16   | 6    | 4    |
| 2800 | 55   | 113  | 50   | 48   | 17   | 4    | 1    | -    | -    | 6    | 16   | 23   | 10   | 12   |
| 2700 | 59   | 147  | 62   | 83   | 25   | 11   | 2    | 1    | 3    | 7    | 31   | 31   | 15   | 17   |
| 2600 | 104  | 189  | 105  | 101  | 20   | 12   | -    | 1    | 4    | 21   | 50   | 51   | 20   | 22   |
| 2500 | 130  | 261  | 154  | 155  | 55   | 13   | -    | 1    | 5    | 24   | 58   | 61   | 30   | 46   |
| 2400 | 201  | 331  | 200  | 206  | 60   | 22   | 1    | -    | 13   | 50   | 112  | 104  | 56   | 68   |
| 2300 | 226  | 429  | 253  | 260  | 85   | 38   | -    | 2    | 19   | 85   | 154  | 145  | 107  | 98   |
| 2200 | 347  | 512  | 309  | 322  | 129  | 44   | 2    | 1    | 58   | 98   | 193  | 210  | 122  | 151  |
| 2100 | 475  | 678  | 410  | 444  | 173  | 81   | 5    | 2    | 76   | 159  | 346  | 350  | 182  | 200  |
| 2000 | 586  | 911  | 569  | 589  | 246  | 93   | 2    | 7    | 135  | 201  | 447  | 411  | 295  | 290  |
| 1900 | 814  | 1177 | 796  | 766  | 333  | 177  | 15   | 12   | 179  | 314  | 617  | 752  | 408  | 469  |
| 1800 | 1044 | 1529 | 1161 | 1028 | 432  | 225  | 33   | 21   | 305  | 568  | 929  | 1091 | 710  | 694  |
| 1700 | 1510 | 1980 | 1567 | 1372 | 561  | 330  | 51   | 41   | 475  | 991  | 1165 | 1419 | 1069 | 1117 |
| 1600 | 1956 | 2327 | 2045 | 1741 | 691  | 452  | 79   | 81   | 870  | 1842 | 1349 | 1833 | 1540 | 1552 |
| 1500 | 2330 | 2406 | 2467 | 2084 | 832  | 579  | 143  | 151  | 1464 | 2734 | 1567 | 2136 | 1992 | 2043 |
| 1400 | 2691 | 2556 | 2722 | 2359 | 1126 | 777  | 333  | 304  | 2433 | 2753 | 1661 | 2208 | 2304 | 2408 |
| 1300 | 2894 | 2639 | 2908 | 2547 | 1367 | 971  | 595  | 545  | 3045 | 2384 | 1766 | 2310 | 2604 | 2664 |
| 1200 | 2964 | 2728 | 3194 | 2859 | 1710 | 1268 | 953  | 870  | 2727 | 1993 | 1795 | 2358 | 2740 | 2673 |
| 1100 | 3298 | 2858 | 3301 | 3272 | 2126 | 1591 | 1150 | 1128 | 2421 | 2063 | 1881 | 2530 | 2930 | 2884 |
| 1000 | 3455 | 3039 | 3539 | 3635 | 2554 | 1923 | 1337 | 1275 | 2539 | 2142 | 1988 | 2601 | 3137 | 3237 |
| 900  | 3875 | 3428 | 3968 | 4036 | 3008 | 2369 | 1417 | 1405 | 2666 | 2305 | 2023 | 2795 | 3552 | 3500 |
| 800  | 3922 | 3664 | 4044 | 4534 | 3474 | 2758 | 1414 | 1515 | 2802 | 2335 | 2212 | 3119 | 3648 | 3885 |
| 700  | 4377 | 4001 | 4213 | 4612 | 3809 | 3241 | 1505 | 1586 | 2854 | 2472 | 2292 | 3202 | 3879 | 4039 |
| 600  | 4684 | 4315 | 4508 | 4661 | 4036 | 3734 | 1731 | 1836 | 3025 | 2491 | 2486 | 3350 | 3940 | 4211 |
| 500  | 4572 | 4449 | 4674 | 4741 | 4143 | 4067 | 1955 | 2180 | 3017 | 2601 | 2463 | 3271 | 3856 | 4288 |
| 400  | 4593 | 4454 | 4686 | 4792 | 4138 | 4431 | 2271 | 2730 | 3043 | 2609 | 2295 | 3199 | 3829 | 4192 |
| 300  | 4197 | 3891 | 4431 | 4396 | 4159 | 5032 | 2861 | 3242 | 2697 | 2377 | 2042 | 2809 | 3509 | 3666 |

|     |      |      |      |      |      |      |      |      |      |      |      |      |      |      |
|-----|------|------|------|------|------|------|------|------|------|------|------|------|------|------|
| 200 | 3581 | 3332 | 3811 | 3869 | 4373 | 5685 | 3686 | 4063 | 2371 | 2064 | 1733 | 2319 | 2839 | 3236 |
| 100 | 4432 | 3713 | 4428 | 4687 | 6634 | 9414 | 6707 | 7566 | 2985 | 2447 | 2189 | 2827 | 3290 | 3903 |

| Peak size (bp) | 500C Pub ATAC Rep1 | 500C Pub ATAC Rep2 | Duke | UW |
|----------------|--------------------|--------------------|------|----|
| 7000           | 1                  | -                  | -    | -  |
| 6900           | -                  | -                  | 1    | -  |
| 6800           | -                  | -                  | -    | 1  |
| 6700           | -                  | -                  | -    | -  |
| 6300           | -                  | -                  | -    | -  |
| 6200           | -                  | -                  | -    | -  |
| 5800           | -                  | -                  | -    | -  |
| 5500           | 1                  | -                  | -    | -  |
| 5000           | -                  | -                  | -    | 2  |
| 4800           | -                  | -                  | -    | -  |
| 4700           | -                  | -                  | -    | 3  |
| 4600           | -                  | -                  | -    | 1  |
| 4500           | -                  | -                  | -    | 2  |
| 4400           | 1                  | -                  | -    | 3  |
| 4300           | -                  | -                  | -    | 1  |
| 4200           | 2                  | -                  | 1    | 3  |
| 4100           | -                  | -                  | 1    | 3  |
| 4000           | -                  | -                  | -    | 10 |
| 3900           | 1                  | 1                  | -    | 6  |
| 3800           | 1                  | -                  | 3    | 8  |
| 3700           | 1                  | -                  | 2    | 9  |
| 3600           | 1                  | -                  | 5    | 22 |
| 3500           | 2                  | -                  | 7    | 34 |

|      |      |      |      |      |
|------|------|------|------|------|
| 3400 | 1    | 2    | 16   | 22   |
| 3300 | 2    | 2    | 15   | 42   |
| 3200 | 4    | -    | 28   | 50   |
| 3100 | 4    | -    | 35   | 75   |
| 3000 | 7    | 1    | 60   | 93   |
| 2900 | 5    | -    | 73   | 141  |
| 2800 | 5    | 2    | 107  | 164  |
| 2700 | 12   | 3    | 136  | 192  |
| 2600 | 19   | -    | 184  | 283  |
| 2500 | 31   | 1    | 239  | 344  |
| 2400 | 52   | 7    | 299  | 449  |
| 2300 | 49   | 7    | 462  | 547  |
| 2200 | 88   | 3    | 646  | 746  |
| 2100 | 121  | 15   | 870  | 1078 |
| 2000 | 147  | 11   | 1193 | 1418 |
| 1900 | 201  | 17   | 1519 | 1904 |
| 1800 | 300  | 13   | 1782 | 2140 |
| 1700 | 326  | 25   | 1908 | 2274 |
| 1600 | 466  | 30   | 1934 | 2270 |
| 1500 | 540  | 41   | 1902 | 2346 |
| 1400 | 562  | 62   | 1871 | 2289 |
| 1300 | 661  | 82   | 1897 | 2405 |
| 1200 | 721  | 170  | 2259 | 2477 |
| 1100 | 829  | 278  | 2428 | 2557 |
| 1000 | 854  | 424  | 2702 | 2694 |
| 900  | 893  | 549  | 2914 | 2825 |
| 800  | 959  | 805  | 2864 | 2939 |
| 700  | 1025 | 999  | 2851 | 3062 |
| 600  | 1103 | 1332 | 2722 | 3228 |
| 500  | 1220 | 1673 | 2445 | 3139 |

|     |      |       |      |      |
|-----|------|-------|------|------|
| 400 | 1315 | 2200  | 2106 | 3012 |
| 300 | 1302 | 3185  | 1694 | 2546 |
| 200 | 1342 | 4654  | 1265 | 2010 |
| 100 | 2154 | 22304 | 1401 | 2121 |

Supp. Table 3

| Sample                                                                                                                    | Total unique reads | Peaks  | Total coverage | Duke overlap | UW overlap | Duke % overlap | UW % overlap | Alignments under peaks |
|---------------------------------------------------------------------------------------------------------------------------|--------------------|--------|----------------|--------------|------------|----------------|--------------|------------------------|
| 100C_THS_Tn5059_Rep1                                                                                                      | 8,351,125          | 58,100 | 53,753,500     | 29,577,184   | 40,382,253 | 59.28%         | 67.55%       | 1,926,239              |
| 100C_THS_Tn5059_Rep2                                                                                                      | 8,351,125          | 56,514 | 59,097,200     | 32,177,819   | 43,333,154 | 64.50%         | 72.49%       | 2,401,391              |
| 500C_THS_Tn5059_Rep1                                                                                                      | 8,351,125          | 64,663 | 56,015,300     | 24,628,096   | 35,999,644 | 49.36%         | 60.22%       | 2,083,387              |
| 500C_THS_Tn5059_Rep2                                                                                                      | 8,351,125          | 64,323 | 54,271,200     | 24,134,574   | 35,015,673 | 48.38%         | 58.58%       | 1,820,897              |
| 500C_THS_EzTn5_Rep1                                                                                                       | 8,351,125          | 50,352 | 34,000,500     | 16,584,237   | 21,945,810 | 33.24%         | 36.71%       | 905,678                |
| 500C_THS_EzTn5_Rep2                                                                                                       | 8,351,125          | 49,354 | 27,420,600     | 12,733,915   | 17,279,146 | 25.52%         | 28.91%       | 749,105                |
| 500C_ATAC_Tn5059_Rep1                                                                                                     | 8,351,125          | 28,252 | 14,190,500     | 10,463,017   | 10,518,599 | 20.97%         | 17.60%       | 541,392                |
| 500C_ATAC_Tn5059_Rep2                                                                                                     | 8,351,125          | 30,569 | 14,634,200     | 10,243,564   | 10,277,123 | 20.53%         | 17.19%       | 534,833                |
| 500C_ATAC_EzTn5_Rep1                                                                                                      | 8,351,125          | 42,240 | 34,575,500     | 26,615,551   | 27,439,757 | 53.35%         | 45.90%       | 2,254,535              |
| 500C_ATAC_EzTn5_Rep2                                                                                                      | 8,351,125          | 40,157 | 36,477,100     | 26,543,578   | 27,668,343 | 53.20%         | 46.28%       | 1,998,408              |
| 50kC_Pub_ATAC_Rep1                                                                                                        | 8,351,125          | 35,908 | 33,400,400     | 24,772,383   | 27,067,883 | 49.65%         | 45.28%       | -                      |
| 50kC_Pub_ATAC_Rep2                                                                                                        | 8,351,125          | 47,558 | 43,184,100     | 28,993,599   | 32,932,251 | 58.12%         | 55.09%       | -                      |
| 50kC_Pub_ATAC_Rep3                                                                                                        | 8,351,125          | 52,632 | 44,060,100     | 27,172,983   | 30,810,815 | 54.47%         | 51.54%       | -                      |
| 50kC_Pub_ATAC_Rep4                                                                                                        | 8,351,125          | 55,585 | 45,643,500     | 27,849,765   | 32,074,371 | 55.82%         | 53.66%       | -                      |
| 500C_Pub_ATAC_Rep1                                                                                                        | 8,351,125          | 17,331 | 13,540,000     | 11,003,510   | 11,456,205 | 22.06%         | 19.16%       | -                      |
| 500C_Pub_ATAC_Rep2                                                                                                        | 7,538,481          | 38,898 | 9,934,200      | 4,410,337    | 4,769,889  | 8.84%          | 7.98%        | -                      |
| Replicate in each sample set with the most number of base pairs called significant (Total coverage) was used for analysis |                    |        |                |              |            |                |              |                        |

Supp. Table 4

| Sample                                                                                                                    | Total Reads | Mapped Reads | Mapped % | Clonal Reads | Clonal % | Total unique reads | Peaks  | Total coverage |
|---------------------------------------------------------------------------------------------------------------------------|-------------|--------------|----------|--------------|----------|--------------------|--------|----------------|
| 100C_THS_Tn5059_Rep1                                                                                                      | 83,435,049  | 77,241,514   | 92.58%   | 65,637,161   | 84.98%   | 11,604,353         | 63,485 | 55,039,700     |
| 100C_THS_Tn5059_Rep2                                                                                                      | 71,513,373  | 65,130,466   | 91.07%   | 54,213,284   | 83.24%   | 10,917,182         | 62,316 | 58,602,500     |
| 500C_THS_Tn5059_Rep1                                                                                                      | 36,656,474  | 33,222,486   | 90.63%   | 15,142,913   | 45.58%   | 18,079,573         | 65,109 | 59,052,900     |
| 500C_THS_Tn5059_Rep2                                                                                                      | 43,652,122  | 39,820,044   | 91.22%   | 18,801,045   | 47.22%   | 21,018,999         | 61,678 | 59,997,600     |
| 500C_THS_EzTn5_Rep1                                                                                                       | 42,374,624  | 39,142,475   | 92.37%   | 7,682,430    | 19.63%   | 31,460,045         | 57,656 | 49,323,000     |
| 500C_THS_EzTn5_Rep2                                                                                                       | 49,786,595  | 46,097,848   | 92.59%   | 9,121,951    | 19.79%   | 36,975,897         | 52,544 | 47,328,300     |
| 500C_ATAC_Tn5059_Rep1                                                                                                     | 19,760,628  | 19,370,405   | 98.03%   | 5,111,053    | 26.39%   | 14,259,352         | 31,967 | 13,024,200     |
| 500C_ATAC_Tn5059_Rep2                                                                                                     | 24,827,669  | 24,300,992   | 97.88%   | 7,603,292    | 31.29%   | 16,697,700         | 30,810 | 13,916,800     |
| 500C_ATAC_EzTn5_Rep1                                                                                                      | 23,336,416  | 21,400,014   | 91.70%   | 11,570,533   | 54.07%   | 9,829,481          | 43,630 | 36,711,000     |
| 500C_ATAC_EzTn5_Rep2                                                                                                      | 18,624,957  | 16,319,759   | 87.62%   | 7,968,634    | 48.83%   | 8,351,125          | 40,157 | 36,477,100     |
| 50kC_Pub_ATAC_Rep1                                                                                                        | 192,904,649 | 189,145,446  | 98.05%   | 146,210,593  | 77.30%   | 42,934,853         | 48,869 | 50,185,100     |
| 50kC_Pub_ATAC_Rep2                                                                                                        | 56,598,621  | 55,704,080   | 98.42%   | 42,835,039   | 76.90%   | 12,869,041         | 50,340 | 47,462,300     |
| 50kC_Pub_ATAC_Rep3                                                                                                        | 85,243,035  | 84,161,992   | 98.73%   | 70,278,832   | 83.50%   | 13,883,160         | 53,501 | 50,384,900     |
| 50kC_Pub_ATAC_Rep4                                                                                                        | 62,821,955  | 61,950,510   | 98.61%   | 51,169,895   | 82.60%   | 10,780,615         | 58,385 | 48,154,500     |
| 500C_Pub_ATAC_Rep1                                                                                                        | 23,259,350  | 22,517,253   | 96.81%   | 11,290,578   | 50.14%   | 11,226,675         | 27,494 | 12,828,800     |
| 500C_Pub_ATAC_Rep2                                                                                                        | 22,898,819  | 22,403,334   | 97.84%   | 14,864,853   | 66.35%   | 7,538,481          | 38,898 | 9,934,200      |
| Replicate in each sample set with the most number of base pairs called significant (Total coverage) was used for analysis |             |              |          |              |          |                    |        |                |

| Sample                | Duke overlap | UW overlap | Duke % overlap | UW % overlap |
|-----------------------|--------------|------------|----------------|--------------|
| 100C_THS_Tn5059_Rep1  | 28,235,051   | 39,333,337 | 56.59%         | 65.80%       |
| 100C_THS_Tn5059_Rep2  | 30,593,381   | 41,951,208 | 61.32%         | 70.18%       |
| 500C_THS_Tn5059_Rep1  | 24,797,108   | 37,174,108 | 49.70%         | 62.19%       |
| 500C_THS_Tn5059_Rep2  | 25,018,762   | 37,460,275 | 50.15%         | 62.66%       |
| 500C_THS_EzTn5_Rep1   | 21,427,026   | 29,659,156 | 42.95%         | 49.61%       |
| 500C_THS_EzTn5_Rep2   | 19,133,219   | 27,231,310 | 38.35%         | 45.55%       |
| 500C_ATAC_Tn5059_Rep1 | 8,365,696    | 8,676,219  | 16.77%         | 14.51%       |
| 500C_ATAC_Tn5059_Rep2 | 8,870,056    | 9,182,873  | 17.78%         | 15.36%       |
| 500C_ATAC_EzTn5_Rep1  | 26,391,981   | 27,437,896 | 52.90%         | 45.90%       |
| 500C_ATAC_EzTn5_Rep2  | 26,543,578   | 27,668,343 | 53.20%         | 46.28%       |
| 50kC_Pub_ATAC_Rep1    | 31,243,373   | 36,079,092 | 62.62%         | 60.35%       |
| 50kC_Pub_ATAC_Rep2    | 29,503,465   | 34,317,340 | 59.14%         | 57.41%       |
| 50kC_Pub_ATAC_Rep3    | 28,631,225   | 33,293,399 | 57.39%         | 55.69%       |
| 50kC_Pub_ATAC_Rep4    | 27,640,100   | 32,431,186 | 55.40%         | 54.25%       |
| 500C_Pub_ATAC_Rep1    | 7,961,231    | 8,555,233  | 15.96%         | 14.31%       |
| 500C_Pub_ATAC_Rep2    | 4,410,337    | 4,769,889  | 8.84%          | 7.98%        |



Supp. Table 5

| Name          | DNA sequence                                                                      | notes                |
|---------------|-----------------------------------------------------------------------------------|----------------------|
| T7tspn-top2   | 5'- CATGAGATTAATACGACTCACTATAGGGAGATCCT<br>CCCTCGCGCCATCAGAGATGTGTATAAGAGACAG -3' | PAGE<br>purification |
| T7tspn-bot    | 5'- /5Phos/CTGTCTCTTATACACATCT -3'                                                | 5Phos                |
| sss_NPA_prmr  | 5'- /5Phos/GGGAGATCCTCCCTCGCGCCATCAGAGATGTGTATAAGAGACAG -3'                       | 5Phos                |
| ME_BOT        | 5'- /5Phos/CTGTCTCTTATACACATCT -3'                                                | 5Phos                |
| ME_TOP        | 5'- GCCTTGCCAGCCCGCTCAGAGATGTGTATAAGAGACAG -3'                                    | -                    |
| PCR_5'_primer | 5'- AATGATACGGCGACCACCGAAGATCCTCCCTCGCGCCATCAGAG -3'                              | -                    |
| Nxta_Ind49    | 5'- CAAGCAGAAGACGGCATAACGAGATACACAGCGGTCTGCCTTGCCAGCCCGCTCAG -3'                  | -                    |
| Nxta_Ind50    | 5'- CAAGCAGAAGACGGCATAACGAGATAAAGGTTCGGTCTGCCTTGCCAGCCCGCTCAG -3'                 | -                    |
| Nxta_Ind51    | 5'- CAAGCAGAAGACGGCATAACGAGATGCGATACGGTCTGCCTTGCCAGCCCGCTCAG -3'                  | -                    |
| Nxta_Ind52    | 5'- CAAGCAGAAGACGGCATAACGAGATCGTGTCCGGTCTGCCTTGCCAGCCCGCTCAG -3'                  | -                    |
| Nxta_Ind53    | 5'- CAAGCAGAAGACGGCATAACGAGATGTAGAACGGTCTGCCTTGCCAGCCCGCTCAG -3'                  | -                    |
| Nxta_Ind54    | 5'- CAAGCAGAAGACGGCATAACGAGATGGACGTTCGGTCTGCCTTGCCAGCCCGCTCAG -3'                 | -                    |
| Nxta_Ind55    | 5'- CAAGCAGAAGACGGCATAACGAGATAGTCGACGGTCTGCCTTGCCAGCCCGCTCAG -3'                  | -                    |
| Nxta_Ind56    | 5'- CAAGCAGAAGACGGCATAACGAGATGTCTGACGGTCTGCCTTGCCAGCCCGCTCAG -3'                  | -                    |
| Nxta_Ind57    | 5'- CAAGCAGAAGACGGCATAACGAGATGAAGGACGGTCTGCCTTGCCAGCCCGCTCAG -3'                  | -                    |
| Nxta_Ind58    | 5'- CAAGCAGAAGACGGCATAACGAGATATGCTGCGGTCTGCCTTGCCAGCCCGCTCAG -3'                  | -                    |
| Nxta_Ind59    | 5'- CAAGCAGAAGACGGCATAACGAGATTCTATCCGGTCTGCCTTGCCAGCCCGCTCAG -3'                  | -                    |
| Nxta_Ind60    | 5'- CAAGCAGAAGACGGCATAACGAGATATCTGTTCGGTCTGCCTTGCCAGCCCGCTCAG -3'                 | -                    |
| Nxta_Ind61    | 5'- CAAGCAGAAGACGGCATAACGAGATATAGAGCGGTCTGCCTTGCCAGCCCGCTCAG -3'                  | -                    |
| Nxta_Ind62    | 5'- CAAGCAGAAGACGGCATAACGAGATGCTAAACGGTCTGCCTTGCCAGCCCGCTCAG -3'                  | -                    |
| Nxta_Ind63    | 5'- CAAGCAGAAGACGGCATAACGAGATACCAGGCGGTCTGCCTTGCCAGCCCGCTCAG -3'                  | -                    |
| Nxta_Ind64    | 5'- CAAGCAGAAGACGGCATAACGAGATCCAACGGTCTGCCTTGCCAGCCCGCTCAG -3'                    | -                    |
| Nxta_Ind65    | 5'- CAAGCAGAAGACGGCATAACGAGATAAGGAACGGTCTGCCTTGCCAGCCCGCTCAG -3'                  | -                    |
| Nxta_Ind66    | 5'- CAAGCAGAAGACGGCATAACGAGATCCTCCACGGTCTGCCTTGCCAGCCCGCTCAG -3'                  | -                    |
| Nxta_Ind67    | 5'- CAAGCAGAAGACGGCATAACGAGATCACGTCCGGTCTGCCTTGCCAGCCCGCTCAG -3'                  | -                    |
| Nxta_Ind68    | 5'- CAAGCAGAAGACGGCATAACGAGATCATAACCGGTCTGCCTTGCCAGCCCGCTCAG -3'                  | -                    |
| Nxta_Ind69    | 5'- CAAGCAGAAGACGGCATAACGAGATCCATATCGGTCTGCCTTGCCAGCCCGCTCAG -3'                  | -                    |
| Nxta_Ind70    | 5'- CAAGCAGAAGACGGCATAACGAGATGAAGTCCGGTCTGCCTTGCCAGCCCGCTCAG -3'                  | -                    |

|                     |                                                                  |   |
|---------------------|------------------------------------------------------------------|---|
| Nxta_Ind71          | 5'- CAAGCAGAAGACGGCATAACGAGATCAAAGACGGTCTGCCTTGCCAGCCCGCTCAG -3' | - |
| Nxta_Ind72          | 5'- CAAGCAGAAGACGGCATAACGAGATTGGCAGCGGTCTGCCTTGCCAGCCCGCTCAG -3' | - |
| Nxta_seq_Indx_read  | 5'- CTGTCTCTTATACACATCTCTGAGCGGGCTGGCAAGGCAGACCG -3'             | - |
| Nxta_seq_Read1_long | 5'- CCGAAGATCCTCCCTCGCGCCATCAGAGATGTGTATAAGAGACAG -3'            | - |
